# Supplementary material for: Non biogenic source is an important but overlooked contributor to aerosol isoprene-derived organosulfates during winter in northern China
Source: Copernicus journal article supplement (doi:10.5194/egusphere-2024-3823), 2024-12-09
Supplement: Supplementary file 1 [file egusphere-2024-3823-supplement.pdf]

1 **Non biogenic source is an important but**  
2 **overlooked contributor to aerosol isoprene-**  
3 **derived organosulfates during winter in**  
4 **northern China**

5

6 Ting Yang<sup>1</sup>, Yu Xu<sup>1,2\*</sup>, Yu-Chen Wang<sup>3</sup>, Yi-Jia Ma<sup>1</sup>, Hong-Wei Xiao<sup>1,2</sup>, Hao Xiao<sup>1,2</sup>,  
7 Hua-Yun Xiao<sup>1,2</sup>

8

9 <sup>1</sup>School of Agriculture and Biology, Shanghai Jiao Tong University, Shanghai 200240,  
10 China

11 <sup>2</sup>Shanghai Yangtze River Delta Eco-Environmental Change and Management  
12 Observation and Research Station, Ministry of Science and Technology, Ministry of  
13 Education, Shanghai 200240, China

14 <sup>3</sup>Division of Environment and Sustainability, Hong Kong University of Science and  
15 Technology, Hong Kong SAR 00000, China

16

17

18

19

\*Corresponding authors

20

Yu Xu

21

E-mail: xuyu360@sjtu.edu.cn

22

23

24

|    |                          |         |
|----|--------------------------|---------|
| 25 | <b>Table of Contents</b> |         |
| 26 | Text S1–S3               |         |
| 27 | Table S1                 | Page 8  |
| 28 | Table S2                 | Page 9  |
| 29 | Table S3                 | Page 10 |
| 30 | Table S4                 | Page 12 |
| 31 | Table S5                 | Page 13 |
| 32 | Figure S1                | Page 15 |
| 33 | Figure S2                | Page 16 |
| 34 | Figure S3                | Page 17 |
| 35 | Figure S4                | Page 18 |
| 36 | Figure S5                | Page 17 |
| 37 | Figure S6                | Page 19 |
| 38 | Figure S7                | Page 20 |
| 39 | Figure S8                | Page 21 |
| 40 |                          |         |
| 41 |                          |         |
| 42 |                          |         |
| 43 |                          |         |
| 44 |                          |         |

## 45 **S1. Classification of Organosulfates**

46 Organosulfates (OSs) were identified using an UPLC-ESI-QToFMS (Waters,  
47 USA) in negative (-) ion mode (Wang et al. 2021a; Yang et al. 2023). The obtained  
48 data were processed with a MassLynx v4.1 software to obtain the m/z ratios, formulas,  
49 retention times, and peak areas of identified OSs. A mass spectral library was built  
50 using the compound database function; moreover, the identified compounds can be  
51 expressed as  $C_cH_hO_oN_nS_s$  with a mass tolerance of  $\pm 10$  ppm (where c, h, o, n, and s  
52 represent the number of carbon, hydrogen, oxygen, nitrogen, and sulfur atoms,  
53 respectively). Compounds with oxygen atoms equal to or greater than  $4n_S + 3n_N$  (i.e.,  
54  $n_O/(4n_S + 3n_N) \geq 1$ ) were tentatively classified as OSs (Cai et al. 2020). The  
55 assignments of most OSs were further conducted based on their loss of the sulfur-  
56 containing fragment ions (e.g., m/z 80, 81, and 96) by MS/MS analysis (Hettiyadura  
57 et al. 2015), which was detailed in our recent publication (Yang et al. 2023). The  
58 Double Bond Equivalent value (DBE), indicating the number of rings and double  
59 bonds in an organic molecule, can be calculated using the following equation (Han et  
60 al. 2023).

$$61 \quad \text{DBE} = 1 + n_C - n_H/2 + n_N/2 \quad (1)$$

62 where  $n_N$ ,  $n_H$ , and  $n_C$  indicate the numbers of N, H, and C atoms in a molecular  
63 formula, respectively.

64 All potential OSs were further classified into five categories according to their  
65 carbon number ( $n_C$ ), nitrogen number ( $n_N$ ), oxygen number ( $n_O$ ), and unsaturation  
66 degree indexed by DBE, including isoprene-derived ( $OS_i$ ), monoterpene-derived

67 (OS<sub>m</sub>), C<sub>2</sub>–C<sub>3</sub> OSs, aromatic OSs and aliphatic OSs (Yang et al. 2023). The list of OS<sub>i</sub>  
68 was obtained through the following method: (1) molecules with  $n_C = 4$  and 5 were  
69 selected; (2) C<sub>4</sub> OSs with DBE range of 1–2,  $n_O \leq 6$ , and  $n_H \geq 6$  and C<sub>5</sub> OSs with DBE  
70 range of 0–2,  $n_O \leq 7$ , and  $n_H \geq 8$ . The detailed workflow was provided by Yang et al.  
71 (2023). It should be noted that C<sub>7</sub>H<sub>9</sub>O<sub>7</sub>S<sup>−</sup> was classified as OS<sub>i</sub> based on a previous  
72 study by Nozière et al. (2010b).

73 According to previous laboratory studies, most of OS<sub>m</sub> contain 10 carbon atoms,  
74 with effective oxygen atoms ( $n_{O_{\text{eff}}} = n_O - 2n_N$ ) exceeding 4, and  $2 \leq \text{DBE} \leq 4$  (Guo et  
75 al. 2022; Ehn et al. 2012; Yan et al. 2016; Jokinen et al. 2014; Boyd et al. 2015;  
76 Berndt et al. 2016; Berndt et al. 2018). Additionally, C<sub>9</sub>H<sub>15</sub>O<sub>6</sub>S<sup>−</sup>, C<sub>7</sub>H<sub>11</sub>O<sub>7</sub>S<sup>−</sup>,  
77 C<sub>9</sub>H<sub>14</sub>NO<sub>8</sub>S<sup>−</sup>, C<sub>7</sub>H<sub>11</sub>O<sub>6</sub>S<sup>−</sup>, and C<sub>8</sub>H<sub>13</sub>O<sub>7</sub>S<sup>−</sup> were classified into the OS<sub>m</sub> category based  
78 on previous studies (Yassine et al. 2012; Nozière et al. 2010a; Wang et al. 2017b;  
79 Surratt et al. 2008). Furthermore, a correlation analysis was conducted between the  
80 selected OSs and representative OS<sub>m</sub> (e.g., C<sub>10</sub>H<sub>17</sub>O<sub>5</sub>S<sup>−</sup>) (Bryant et al. 2021).  
81 Accordingly, if a significant correlation ( $r > 0.6$  and  $P < 0.01$ ) was found between  
82 them, the corresponding OS compound was subsequently classified as OS<sub>m</sub>.

83 We further classified the remaining OSs based on their DBE values, aromaticity  
84 equivalent ( $X_C$ ),  $n_{O_{\text{eff}}}$  and  $n_N$ . The aromaticity equivalent ( $X_C$ ) describes potential  
85 monocyclic and polycyclic aromatic compounds. It has been suggested that OSs with  
86  $\text{DBE} \geq 2$  and aromaticity equivalent ( $X_C$ )  $\geq 2.5$  can be classified as aromatic OSs  
87 (Jiang et al. 2022; Xie et al. 2021; Xie et al. 2020; Ma et al. 2022). The  $X_C$  can be  
88 calculated as the following equation (Yassine et al. 2014).

89 
$$X_C = [3(\text{DBE} - (f_m n_O - f_n n_S)) - 2] / [\text{DBE} - (f_m n_O - f_n n_S)] \quad (2)$$

90 where the symbols  $f_n$  and  $f_m$  correspond to the fractions of S and O atoms involved in  
91 the  $\pi$ -bond structure of the compound, respectively (Yassine et al. 2014). The negative  
92 ion mode exhibits a preferential detection capability for compounds such as  
93 carboxylic acids and esters (Ye et al. 2021). Thus, the calculation for  $X_c$  of  
94 organosulfates can be simplified as the following equation (Ye et al. 2021).

95 
$$X_C = [3(\text{DBE} - 0.5(n_O - 4)) - 2] / [\text{DBE} - 0.5(n_O - 4)] \quad (3)$$

96 Nonetheless, previous studies have suggested that a DBE value of 2 for  $\text{OS}_m$   
97 species can be formed via the oxidation of monoterpene by  $\text{NO}_3\cdot$  or  $\cdot\text{OH}$  (Yan et al.  
98 2016; Ehn et al. 2014; Trostl et al. 2016). Clearly, it is difficult to completely  
99 distinguish aromatic OSs from  $\text{OS}_m$  based on DBE values. Hence, aromatic OSs with  
100 a DBE value of 2 were further screened according to correlation analysis between  
101 unidentified aromatic OSs and identified aromatic OSs and  $\text{OS}_m$  (Yang et al. 2023).  
102 The acceptance threshold for the above screening was  $r > 0.6$  and  $P < 0.01$  (Yang et al.  
103 2023).

104 The observed OSs with a  $\text{DBE} < 2$ , such as alkanes and some other unsaturated  
105 compounds, were classified as aliphatic OSs (Xie et al. 2020; Tao et al. 2014).  
106 Recently, some aliphatic oxygenated organic molecules were found to have a DBE  
107 value of 2 (Wang et al. 2021b). Thus, a correlation analysis was conducted between  
108 OSs with  $\text{DBE} = 2$  and identified aliphatic species. If a significant correlation ( $r > 0.6$   
109 and  $P < 0.01$ ) was found between them, the corresponding OS compound was

110 assigned to aliphatic OSs. Additionally, both aliphatic and aromatic OSs were  
111 classified as anthropogenic OSs (OS<sub>a</sub>) (Riva et al. 2016; Riva et al. 2015).

112

## 113 **S2. Quantification of OSs**

114 The accurate quantification of OSs is difficult owing to a lack of authentic  
115 standards. Consequently, the majority of the identified OSs were quantified using  
116 surrogate standards.(Hettiyadura et al. 2019b; Bryant et al. 2021; Wang et al. 2018;  
117 Ding et al. 2022a) The surrogate standards utilized in this study were as follows.  
118 Glycolic acid sulfate (GAS,  $C_2H_3O_6S^-$ ), lactic acid sulfate (LAS,  $C_3H_5O_6^-$ ),  
119 limonaketone sulfate ( $C_9H_{15}O_6S^-$ ), and  $\alpha$ -pinene sulfate ( $C_{10}H_{17}O_5S^-$ ) were self  
120 synthesized according to previous studies (Olson et al. 2011; Wang et al. 2017a).  
121 Methyl sulfate ( $CH_3O_4S^-$ , 99%, Macklin), potassium phenyl sulfate ( $C_6H_5O_4S^-$ , 98%,  
122 Tokyo Chemical Industry), and sodium octyl sulfate ( $C_8H_{17}O_4S^-$ , 95%, Sigma-  
123 Aldrich) are commercial standards (Olson et al. 2011; Huang et al. 2018b; Wang et al.  
124 2018; Wang et al. 2020). Our previous studies have validated the reliability of these  
125 surrogates (Wang et al. 2021a; Yang et al. 2023). In this study, 111 OS were quantified  
126 using the aforementioned surrogate standards. More details of the methods were  
127 described in our previous studies (Yang et al. 2023). The recoveries for these OS  
128 standards ranged from 84% to 94%. Further information on the data quality control  
129 can be referred to our recent work (Yang et al. 2023). It is crucial to highlight that the  
130 OS species quantified in this study should not be interpreted as an exact measurement

131 of OS compounds. Instead, this method represents the optimal approach in the  
132 absence of authentic OS standards (Yang et al. 2023; Huang et al. 2023).

133

### 134 **S3. Estimating of Isoprene Emission Rate**

135 The isoprene emission rate (I) can be calculated using the following equation  
136 (Guenther et al. 1993).

$$137 \quad I = I_s \times C_L \times C_T \quad (4)$$

138 where the  $I_s$  value is the constant at 30°C leaf temperature and 1000  $\mu\text{mol m}^{-2} \text{s}^{-1}$   
139 photosynthetically active radiation (PAR).  $C_L$  and  $C_T$  denote the factors that influence  
140 light and temperature, respectively.  $C_L$  and  $C_T$  can be simply estimated as:

$$141 \quad C_L = \frac{\alpha C_{L1} L}{\sqrt{\alpha^2 L^2 + I}} \quad (5)$$

142

$$143 \quad C_T = \frac{\exp\left(\frac{C_{T1}(T-T_S)}{RT_S T}\right)}{1 + \exp\left(\frac{C_{T2}(T-T_M)}{RT_S T}\right)} \quad (6)$$

144

145 where  $C_{T2} = 230000 \text{ J mol}^{-1}$ ,  $T_M = 314 \text{ K}$ ,  $R = 8.314 \text{ J K}^{-1} \text{ mol}^{-1}$ ,  $\alpha = 0.0027$ ,  $T_S =$   
146  $303 \text{ K}$ ,  $C_{L1} = 1.066$ , and  $C_{T1} = 95000 \text{ J mol}^{-1}$ . Furthermore,  $T$  is leaf temperature (K),  
147 and  $L$  denotes photosynthetically active radiation (PAR) in  $\mu\text{mol m}^{-2} \text{s}^{-1}$  (Guenther et  
148 al. 1993). Data on daily mean temperature and solar radiation during the sampling  
149 periods were downloaded from the National Meteorological Science Data Center  
150 (<https://data.cma.cn/>). PAR was calculated by solar radiation multiplying photon flux  
151 efficacy of  $1.86 \mu\text{mol J}^{-1}$  (Ding et al. 2016). The value of  $C_L \times C_T$  was employed as an  
152 indicator for estimating isoprene emission (Ding et al. 2016; Guenther et al. 1993).

153

154 **Table S1.** The mean values ( $\pm$  SD) of the major parameters observed in different  
 155 cities.

|                                                                | Southern cities   |                   | Northern cities    |                    |
|----------------------------------------------------------------|-------------------|-------------------|--------------------|--------------------|
|                                                                | GZ                | KM                | TY                 | XA                 |
| T ( $^{\circ}$ C)                                              | 15.9 $\pm$ 3.25   | 9.63 $\pm$ 2.52   | -2.56 $\pm$ 2.14   | 1.69 $\pm$ 2.24    |
| RH (%)                                                         | 62.04 $\pm$ 21.39 | 68.25 $\pm$ 7.73  | 42.74 $\pm$ 8.78   | 49.27 $\pm$ 17.47  |
| Wind speed (m/s)                                               | 3.27 $\pm$ 2.07   | 4.17 $\pm$ 1.11   | 2.44 $\pm$ 1.07    | 6.33 $\pm$ 3.36    |
| NO <sub>2</sub> ( $\mu$ g m <sup>-3</sup> )                    | 71.07 $\pm$ 26.89 | 44.01 $\pm$ 16.15 | 61.11 $\pm$ 33.72  | 79.02 $\pm$ 26.17  |
| O <sub>3</sub> ( $\mu$ g m <sup>-3</sup> )                     | 34.62 $\pm$ 22.76 | 37.55 $\pm$ 16.19 | 30.07 $\pm$ 22.84  | 24.67 $\pm$ 13.35  |
| O <sub>x</sub> ( $\mu$ g m <sup>-3</sup> )                     | 105.69 $\pm$ 40.9 | 81.55 $\pm$ 20.2  | 91.19 $\pm$ 15.42  | 103.69 $\pm$ 17.13 |
| C <sub>L</sub> ×C <sub>T</sub>                                 | 0.16 $\pm$ 0.07   | 0.07 $\pm$ 0.03   | 0.01 $\pm$ 0.00    | 0.02 $\pm$ 0.01    |
| SO <sub>2</sub> ( $\mu$ g m <sup>-3</sup> )                    | 15.87 $\pm$ 6.29  | 18.45 $\pm$ 5.34  | 60.36 $\pm$ 40.28  | 31.73 $\pm$ 12.13  |
| ALW ( $\mu$ g m <sup>-3</sup> )                                | 19.62 $\pm$ 25.35 | 8.18 $\pm$ 6.42   | 21.18 $\pm$ 21.21  | 51.63 $\pm$ 81.74  |
| pH                                                             | 2.65 $\pm$ 0.76   | 4.06 $\pm$ 1.61   | 5.99 $\pm$ 0.92    | 5.13 $\pm$ 0.9     |
| NO <sub>3</sub> <sup>-</sup> ( $\mu$ g m <sup>-3</sup> )       | 6.43 $\pm$ 3.53   | 4.83 $\pm$ 3.80   | 14.95 $\pm$ 14.27  | 40.56 $\pm$ 31.79  |
| SO <sub>4</sub> <sup>2-</sup> ( $\mu$ g m <sup>-3</sup> )      | 8.96 $\pm$ 6.11   | 8.09 $\pm$ 4.53   | 14.12 $\pm$ 13.66  | 21.58 $\pm$ 17.3   |
| Ca <sup>2+</sup> ( $\mu$ g m <sup>-3</sup> )                   | 1.01 $\pm$ 0.51   | 2.91 $\pm$ 1.07   | 6.09 $\pm$ 1.72    | 6.69 $\pm$ 5.72    |
| Mg <sup>2+</sup> ( $\mu$ g m <sup>-3</sup> )                   | 0.05 $\pm$ 0.02   | 0.08 $\pm$ 0.03   | 0.34 $\pm$ 0.13    | 0.36 $\pm$ 0.36    |
| N <sub>ss</sub> -K <sup>+</sup> ( $\mu$ g m <sup>-3</sup> )    | 0.76 $\pm$ 0.59   | 0.53 $\pm$ 0.36   | 1.20 $\pm$ 0.98    | 2.64 $\pm$ 1.99    |
| Na <sup>+</sup> ( $\mu$ g m <sup>-3</sup> )                    | 0.17 $\pm$ 0.11   | 0.08 $\pm$ 0.07   | 1.69 $\pm$ 0.85    | 1.59 $\pm$ 2.36    |
| NH <sub>4</sub> <sup>+</sup> ( $\mu$ g m <sup>-3</sup> )       | 4.88 $\pm$ 2.41   | 3.78 $\pm$ 2.67   | 12.11 $\pm$ 11.66  | 20.58 $\pm$ 17.78  |
| N <sub>ss</sub> -Cl <sup>-</sup> ( $\mu$ g m <sup>-3</sup> )   | 0.46 $\pm$ 0.43   | 0.74 $\pm$ 0.36   | 6.39 $\pm$ 5.55    | 5.90 $\pm$ 3.80    |
| PM <sub>2.5</sub> ( $\mu$ g m <sup>-3</sup> )                  | 56.41 $\pm$ 33.06 | 47.62 $\pm$ 30.50 | 81.02 $\pm$ 65.20  | 115.33 $\pm$ 88.85 |
| Total OS <sub>i</sub> (ng m <sup>-3</sup> )                    | 86.65 $\pm$ 60.25 | 61.12 $\pm$ 37.75 | 170.69 $\pm$ 68.75 | 260.32 $\pm$ 71.13 |
| Total OS <sub>m</sub> (ng m <sup>-3</sup> )                    | 57.81 $\pm$ 40.77 | 58.9 $\pm$ 29.70  | 22.34 $\pm$ 7.71   | 40.09 $\pm$ 12.31  |
| Total aromatic-OSs (ng m <sup>-3</sup> )                       | 10.31 $\pm$ 4.64  | 7.81 $\pm$ 2.25   | 27.10 $\pm$ 17.30  | 34.75 $\pm$ 8.91   |
| Total aliphatic-OSs (ng m <sup>-3</sup> )                      | 8.23 $\pm$ 3.77   | 10.41 $\pm$ 5.33  | 14.13 $\pm$ 7.91   | 19.46 $\pm$ 8.11   |
| Total C <sub>2</sub> -C <sub>3</sub> OSs (ng m <sup>-3</sup> ) | 25.22 $\pm$ 15.09 | 28.55 $\pm$ 16.4  | 13.43 $\pm$ 2.34   | 25.81 $\pm$ 10.76  |

156



157 **Table S2.** The mean mass concentrations ( $\pm$  SD) of identified OS<sub>i</sub>, OS<sub>m</sub>, and C<sub>2</sub>-C<sub>3</sub>  
 158 OSs in PM<sub>2.5</sub> collected in different cities.

| Formula<br>[M-H] <sup>-</sup>                                   | MW (Da)  | Southern cities             |                             | Northern cities             |                             |
|-----------------------------------------------------------------|----------|-----------------------------|-----------------------------|-----------------------------|-----------------------------|
|                                                                 |          | GZ<br>(ng m <sup>-3</sup> ) | KM<br>(ng m <sup>-3</sup> ) | TY<br>(ng m <sup>-3</sup> ) | XA<br>(ng m <sup>-3</sup> ) |
| <b>OS<sub>i</sub></b>                                           |          |                             |                             |                             |                             |
| C <sub>4</sub> H <sub>7</sub> O <sub>5</sub> S <sup>-</sup>     | 167.0014 | 2.7 ± 1.53                  | 2.77 ± 1.71                 | 3.07 ± 0.72                 | 4.74 ± 1.72                 |
| C <sub>4</sub> H <sub>6</sub> O <sub>5</sub> S <sup>-</sup>     | 165.9936 | 7.86 ± 4.70                 | 5.97 ± 4.78                 | 29.54 ± 19.77               | 23.40 ± 13.74               |
| C <sub>5</sub> H <sub>9</sub> O <sub>6</sub> S <sup>-</sup>     | 197.0120 | 15.94 ± 10.59               | 11.82 ± 8.42                | 75.92 ± 46.15               | 71.09 ± 24.18               |
| C <sub>4</sub> H <sub>7</sub> O <sub>7</sub> S <sup>-</sup>     | 198.9912 | 12.63 ± 10.16               | 10.38 ± 9.11                | 10.42 ± 8.97                | 13.50 ± 3.81                |
| C <sub>5</sub> H <sub>11</sub> O <sub>6</sub> S <sup>-</sup>    | 199.0276 | 1.69 ± 1.32                 | 2.04 ± 1.52                 | 2.43 ± 0.85                 | 1.60 ± 0.48                 |
| C <sub>5</sub> H <sub>7</sub> O <sub>7</sub> S <sup>-</sup>     | 210.9912 | 6.03 ± 8.30                 | 3.74 ± 2.51                 | 7.65 ± 3.92                 | 10.93 ± 6.24                |
| C <sub>5</sub> H <sub>9</sub> O <sub>7</sub> S <sup>-</sup>     | 213.0069 | 10.07 ± 8.88                | 6.21 ± 4.34                 | 24.49 ± 12.27               | 104.72 ± 44.75              |
| C <sub>5</sub> H <sub>11</sub> O <sub>7</sub> S <sup>-</sup>    | 215.0225 | 3.22 ± 3.36                 | 2.83 ± 1.76                 | 0.73 ± 0.19                 | 1.93 ± 0.62                 |
| C <sub>7</sub> H <sub>9</sub> O <sub>7</sub> S <sup>-</sup>     | 237.0069 | 4.74 ± 3.69                 | 1.56 ± 1.27                 | 1.57 ± 0.96                 | 3.35 ± 1.40                 |
| C <sub>5</sub> H <sub>8</sub> NO <sub>10</sub> S <sup>-</sup>   | 273.9869 | 0.25 ± 0.04                 | 0.29 ± 0.05                 | 0.32 ± 0.07                 | 0.29 ± 0.12                 |
| C <sub>5</sub> H <sub>7</sub> O <sub>8</sub> S <sup>-</sup>     | 226.9862 | 10.18 ± 7.12                | 3.80 ± 2.90                 | 2.25 ± 1.72                 | 5.33 ± 3.26                 |
| C <sub>4</sub> H <sub>8</sub> NO <sub>7</sub> S <sup>-</sup>    | 243.9763 | 0.79 ± 0.35                 | 0.74 ± 0.40                 | 1.34 ± 0.53                 | 3.91 ± 1.97                 |
| C <sub>4</sub> H <sub>7</sub> O <sub>8</sub> S <sup>-</sup>     | 214.9862 | 0.87 ± 0.41                 | 1.76 ± 1.63                 | 3.62 ± 3.96                 | 1.28 ± 0.78                 |
| C <sub>4</sub> H <sub>5</sub> O <sub>7</sub> S <sup>-</sup>     | 196.9756 | 2.40 ± 1.28                 | 1.58 ± 0.70                 | 1.33 ± 0.44                 | 2.36 ± 1.90                 |
| C <sub>4</sub> H <sub>6</sub> NO <sub>9</sub> S <sup>-</sup>    | 243.9763 | 0.28 ± 0.06                 | 0.28 ± 0.04                 | 0.24 ± 0.04                 | 0.27 ± 0.06                 |
| C <sub>5</sub> H <sub>9</sub> O <sub>8</sub> S <sup>-</sup>     | 229.0018 | 3.07 ± 1.90                 | 3.71 ± 2.49                 | 3.62 ± 2.46                 | 6.86 ± 2.70                 |
| C <sub>5</sub> H <sub>10</sub> NO <sub>9</sub> S <sup>-</sup>   | 260.0076 | 0.18 ± 0.00                 | 0.23 ± 0.03                 | 0.19 ± 0.01                 | 0.18 ± 0.00                 |
| C <sub>5</sub> H <sub>8</sub> NO <sub>7</sub> S <sup>-</sup>    | 226.0021 | 3.74 ± 2.81                 | 1.41 ± 1.00                 | 1.98 ± 1.43                 | 4.59 ± 2.62                 |
| <b>OS<sub>m</sub></b>                                           |          |                             |                             |                             |                             |
| C <sub>7</sub> H <sub>11</sub> O <sub>6</sub> S <sup>-</sup>    | 223.0276 | 9.51 ± 6.01                 | 6.48 ± 4.59                 | 7.07 ± 3.40                 | 7.67 ± 2.80                 |
| C <sub>7</sub> H <sub>11</sub> O <sub>7</sub> S <sup>-</sup>    | 239.0225 | 10.23 ± 9.22                | 5.65 ± 4.62                 | 4.49 ± 2.18                 | 6.68 ± 2.86                 |
| C <sub>9</sub> H <sub>15</sub> O <sub>6</sub> S <sup>-</sup>    | 251.0589 | 0.23 ± 0.06                 | 0.68 ± 0.24                 | 0.25 ± 0.05                 | 0.41 ± 0.13                 |
| C <sub>8</sub> H <sub>13</sub> O <sub>7</sub> S <sup>-</sup>    | 253.0382 | 2.05 ± 1.65                 | 0.51 ± 0.13                 | 2.59 ± 1.96                 | 2.56 ± 0.81                 |
| C <sub>10</sub> H <sub>15</sub> O <sub>7</sub> S <sup>-</sup>   | 279.0538 | 8.23 ± 8.25                 | 3.96 ± 3.05                 | 1.87 ± 0.52                 | 3.54 ± 1.88                 |
| C <sub>10</sub> H <sub>16</sub> NO <sub>7</sub> S <sup>-</sup>  | 294.0647 | 18.26 ± 14.43               | 15.88 ± 11.68               | 2.62 ± 0.82                 | 6.81 ± 3.17                 |
| C <sub>9</sub> H <sub>14</sub> NO <sub>8</sub> S <sup>-</sup>   | 296.0440 | 4.58 ± 2.19                 | 20.15 ± 8.81                | 1.62 ± 0.80                 | 8.92 ± 3.59                 |
| C <sub>10</sub> H <sub>16</sub> NO <sub>10</sub> S <sup>-</sup> | 342.0495 | 1.18 ± 0.52                 | 3.50 ± 2.03                 | 0.71 ± 0.37                 | 1.73 ± 1.67                 |
| C <sub>10</sub> H <sub>15</sub> O <sub>5</sub> S <sup>-</sup>   | 247.0640 | 2.45 ± 2.54                 | 0.58 ± 0.37                 | 0.24 ± 0.02                 | 0.55 ± 0.17                 |
| C <sub>10</sub> H <sub>15</sub> O <sub>6</sub> S <sup>-</sup>   | 263.0589 | 0.26 ± 0.09                 | 0.46 ± 0.17                 | 0.16 ± 0.03                 | 0.37 ± 0.09                 |
| C <sub>10</sub> H <sub>17</sub> O <sub>6</sub> S <sup>-</sup>   | 265.0746 | 0.11 ± 0.01                 | 0.15 ± 0.02                 | 0.11 ± 0.02                 | 0.11 ± 0.01                 |
| C <sub>10</sub> H <sub>17</sub> O <sub>8</sub> S <sup>-</sup>   | 297.0644 | 0.17 ± 0.08                 | 0.19 ± 0.04                 | 0.16 ± 0.04                 | 0.22 ± 0.08                 |
| C <sub>10</sub> H <sub>15</sub> O <sub>8</sub> S <sup>-</sup>   | 295.0488 | 0.13 ± 0.04                 | 0.18 ± 0.04                 | 0.10 ± 0.01                 | 0.12 ± 0.02                 |
| C <sub>10</sub> H <sub>17</sub> NO <sub>9</sub> S <sup>-</sup>  | 326.0546 | 0.10 ± 0.00                 | 0.13 ± 0.02                 | 0.13 ± 0.02                 | 0.11 ± 0.01                 |
| C <sub>9</sub> H <sub>11</sub> O <sub>8</sub> S <sup>-</sup>    | 279.0175 | 0.23 ± 0.09                 | 0.28 ± 0.07                 | 0.12 ± 0.01                 | 0.17 ± 0.04                 |
| <b>C<sub>2</sub>-C<sub>3</sub> OSs</b>                          |          |                             |                             |                             |                             |
| C <sub>3</sub> H <sub>5</sub> O <sub>4</sub> S <sup>-</sup>     | 136.9909 | 1.92 ± 0.64                 | 2.03 ± 0.51                 | 2.52 ± 0.61                 | 3.16 ± 1.04                 |
| C <sub>2</sub> H <sub>3</sub> O <sub>5</sub> S <sup>-</sup>     | 138.9701 | 1.39 ± 0.28                 | 1.53 ± 0.26                 | 1.16 ± 0.08                 | 1.16 ± 0.14                 |
| C <sub>3</sub> H <sub>5</sub> O <sub>5</sub> S <sup>-</sup>     | 152.9858 | 5.07 ± 2.89                 | 4.12 ± 1.43                 | 2.82 ± 0.55                 | 4.72 ± 1.73                 |
| C <sub>2</sub> H <sub>3</sub> O <sub>6</sub> S <sup>-</sup>     | 154.9650 | 8.45 ± 5.52                 | 9.8 ± 6.65                  | 2.25 ± 0.35                 | 5.36 ± 1.94                 |
| C <sub>3</sub> H <sub>7</sub> O <sub>5</sub> S <sup>-</sup>     | 155.0014 | 2.31 ± 0.99                 | 3.84 ± 1.81                 | 2.77 ± 1.61                 | 5.47 ± 4.61                 |
| C <sub>3</sub> H <sub>5</sub> O <sub>6</sub> S <sup>-</sup>     | 168.9807 | 6.07 ± 5.22                 | 7.24 ± 6.38                 | 1.91 ± 0.69                 | 5.95 ± 2.49                 |

159

160 **Table S3.** The mean mass concentrations ( $\pm$  SD) of identified anthropogenic OSs in  
 161 PM<sub>2.5</sub> collected in different cities.

| Formula[M-H] <sup>-</sup>                                      | MW(Da)   | Southern cities             |                             | Northern cities             |                             |
|----------------------------------------------------------------|----------|-----------------------------|-----------------------------|-----------------------------|-----------------------------|
|                                                                |          | GZ<br>(ng m <sup>-3</sup> ) | KM<br>(ng m <sup>-3</sup> ) | TY<br>(ng m <sup>-3</sup> ) | XA<br>(ng m <sup>-3</sup> ) |
| <b>Aliphatic OSs</b>                                           |          |                             |                             |                             |                             |
| C <sub>12</sub> H <sub>21</sub> O <sub>7</sub> S <sup>-</sup>  | 309.1008 | 0.07 ± 0.04                 | 0.04 ± 0.03                 | 0.04 ± 0.04                 | 0.05 ± 0.05                 |
| C <sub>8</sub> H <sub>17</sub> O <sub>4</sub> S <sup>-</sup>   | 210.0926 | 0.07 ± 0.05                 | 0.45 ± 0.36                 | 0.49 ± 0.21                 | 0.49 ± 0.16                 |
| C <sub>14</sub> H <sub>29</sub> O <sub>5</sub> S <sup>-</sup>  | 309.1736 | 0.15 ± 0.11                 | 0.21 ± 0.07                 | 0.53 ± 0.55                 | 0.46 ± 0.43                 |
| C <sub>7</sub> H <sub>15</sub> O <sub>4</sub> S <sup>-</sup>   | 195.0691 | 0.12 ± 0.24                 | 0.25 ± 0.18                 | 1.18 ± 0.56                 | 0.87 ± 0.41                 |
| C <sub>7</sub> H <sub>15</sub> O <sub>5</sub> S <sup>-</sup>   | 211.064  | 0.05 ± 0.04                 | 0.06 ± 0.03                 | 0.06 ± 0.02                 | 0.15 ± 0.10                 |
| C <sub>9</sub> H <sub>19</sub> O <sub>4</sub> S <sup>-</sup>   | 223.1004 | 0.26 ± 0.11                 | 0.67 ± 0.65                 | 0.90 ± 0.57                 | 1.26 ± 0.74                 |
| C <sub>10</sub> H <sub>21</sub> O <sub>4</sub> S <sup>-</sup>  | 237.1161 | 0.27 ± 0.11                 | 0.44 ± 0.90                 | 0.82 ± 0.34                 | 1.01 ± 0.97                 |
| C <sub>7</sub> H <sub>13</sub> O <sub>5</sub> S <sup>-</sup>   | 209.0484 | 0.20 ± 0.08                 | 0.16 ± 0.09                 | 0.36 ± 0.10                 | 0.67 ± 0.13                 |
| C <sub>9</sub> H <sub>17</sub> O <sub>5</sub> S <sup>-</sup>   | 237.0797 | 0.09 ± 0.09                 | 0.09 ± 0.04                 | 0.56 ± 0.26                 | 0.46 ± 0.26                 |
| C <sub>10</sub> H <sub>19</sub> O <sub>5</sub> S <sup>-</sup>  | 251.0953 | 0.82 ± 0.42                 | 0.18 ± 0.12                 | 0.31 ± 0.11                 | 0.39 ± 0.15                 |
| C <sub>9</sub> H <sub>17</sub> O <sub>7</sub> S <sup>-</sup>   | 269.0695 | 0.18 ± 0.23                 | 0.06 ± 0.06                 | 0.02 ± 0.01                 | 0.09 ± 0.06                 |
| C <sub>12</sub> H <sub>23</sub> O <sub>5</sub> S <sup>-</sup>  | 279.1266 | 0.05 ± 0.04                 | 0.03 ± 0.01                 | 0.08 ± 0.06                 | 0.11 ± 0.04                 |
| C <sub>9</sub> H <sub>17</sub> O <sub>4</sub> S <sup>-</sup>   | 221.0848 | 0.23 ± 0.39                 | 0.57 ± 0.60                 | 0.79 ± 0.46                 | 1.20 ± 0.40                 |
| C <sub>9</sub> H <sub>17</sub> O <sub>6</sub> S <sup>-</sup>   | 253.0746 | 0.30 ± 0.32                 | 0.21 ± 0.15                 | 0.13 ± 0.06                 | 0.31 ± 0.26                 |
| C <sub>13</sub> H <sub>25</sub> O <sub>5</sub> S <sup>-</sup>  | 293.1423 | 0.43 ± 0.32                 | 0.26 ± 0.18                 | 0.56 ± 0.32                 | 0.88 ± 0.34                 |
| C <sub>14</sub> H <sub>27</sub> O <sub>5</sub> S <sup>-</sup>  | 307.1579 | 0.49 ± 0.31                 | 0.32 ± 0.24                 | 0.62 ± 0.41                 | 0.88 ± 0.38                 |
| C <sub>13</sub> H <sub>25</sub> O <sub>6</sub> S <sup>-</sup>  | 309.1372 | 0.04 ± 0.04                 | 0.04 ± 0.03                 | 0.09 ± 0.07                 | 0.16 ± 0.14                 |
| C <sub>14</sub> H <sub>27</sub> O <sub>6</sub> S <sup>-</sup>  | 323.1528 | 0.09 ± 0.08                 | 0.13 ± 0.07                 | 0.23 ± 0.21                 | 0.43 ± 0.36                 |
| C <sub>16</sub> H <sub>31</sub> O <sub>5</sub> S <sup>-</sup>  | 335.1892 | 0.10 ± 0.11                 | 0.17 ± 0.15                 | 0.42 ± 0.43                 | 0.44 ± 0.39                 |
| C <sub>17</sub> H <sub>33</sub> O <sub>5</sub> S <sup>-</sup>  | 363.2205 | 0.04 ± 0.01                 | 0.23 ± 0.11                 | 0.13 ± 0.10                 | 0.16 ± 0.10                 |
| C <sub>16</sub> H <sub>31</sub> O <sub>6</sub> S <sup>-</sup>  | 351.1841 | 1.43 ± 0.92                 | 2.64 ± 1.55                 | 2.75 ± 2.39                 | 4.87 ± 3.81                 |
| C <sub>18</sub> H <sub>35</sub> O <sub>5</sub> S <sup>-</sup>  | 363.2205 | 0.06 ± 0.06                 | 0.06 ± 0.04                 | 0.19 ± 0.19                 | 0.31 ± 0.26                 |
| C <sub>21</sub> H <sub>41</sub> O <sub>5</sub> S <sup>-</sup>  | 405.2675 | 0.01 ± 0.01                 | 0.01 ± 0.01                 | 0.02 ± 0.03                 | 0.02 ± 0.01                 |
| C <sub>8</sub> H <sub>15</sub> O <sub>5</sub> S <sup>-</sup>   | 223.0640 | 0.11 ± 0.05                 | 0.18 ± 0.14                 | 0.24 ± 0.10                 | 0.29 ± 0.12                 |
| C <sub>7</sub> H <sub>13</sub> O <sub>6</sub> S <sup>-</sup>   | 225.0433 | 0.18 ± 0.18                 | 0.12 ± 0.11                 | 0.16 ± 0.16                 | 0.30 ± 0.09                 |
| C <sub>8</sub> H <sub>15</sub> O <sub>6</sub> S <sup>-</sup>   | 239.0589 | 0.26 ± 0.17                 | 0.54 ± 0.28                 | 0.26 ± 0.10                 | 0.46 ± 0.31                 |
| C <sub>11</sub> H <sub>21</sub> O <sub>5</sub> S <sup>-</sup>  | 265.1110 | 0.15 ± 0.06                 | 0.14 ± 0.08                 | 0.29 ± 0.14                 | 0.49 ± 0.22                 |
| C <sub>10</sub> H <sub>19</sub> O <sub>6</sub> S <sup>-</sup>  | 267.0902 | 0.11 ± 0.08                 | 0.12 ± 0.06                 | 0.20 ± 0.08                 | 0.21 ± 0.14                 |
| C <sub>7</sub> H <sub>13</sub> O <sub>9</sub> S <sup>-</sup>   | 273.0280 | 0.08 ± 0.07                 | 0.30 ± 0.33                 | 0.55 ± 0.29                 | 0.38 ± 0.31                 |
| C <sub>15</sub> H <sub>29</sub> O <sub>5</sub> S <sup>-</sup>  | 321.1736 | 0.46 ± 0.40                 | 0.27 ± 0.28                 | 0.33 ± 0.38                 | 0.47 ± 0.11                 |
| C <sub>10</sub> H <sub>17</sub> O <sub>6</sub> S <sup>-</sup>  | 265.0746 | 0.05 ± 0.02                 | 0.06 ± 0.04                 | 0.05 ± 0.03                 | 0.11 ± 0.06                 |
| C <sub>9</sub> H <sub>15</sub> O <sub>5</sub> S <sup>-</sup>   | 235.0640 | 0.34 ± 0.24                 | 0.41 ± 0.12                 | 0.10 ± 0.06                 | 0.15 ± 0.06                 |
| C <sub>10</sub> H <sub>17</sub> O <sub>5</sub> S <sup>-</sup>  | 249.0797 | 0.13 ± 0.07                 | 0.55 ± 0.32                 | 0.11 ± 0.04                 | 0.28 ± 0.14                 |
| C <sub>9</sub> H <sub>15</sub> O <sub>6</sub> S <sup>-</sup>   | 251.0589 | 0.30 ± 0.29                 | 0.19 ± 0.12                 | 0.41 ± 0.27                 | 0.43 ± 0.15                 |
| C <sub>11</sub> H <sub>19</sub> O <sub>6</sub> S <sup>-</sup>  | 279.0902 | 0.03 ± 0.02                 | 0.03 ± 0.02                 | 0.07 ± 0.04                 | 0.10 ± 0.04                 |
| C <sub>8</sub> H <sub>13</sub> O <sub>6</sub> S <sup>-</sup>   | 237.0433 | 0.13 ± 0.06                 | 0.09 ± 0.05                 | 0.04 ± 0.01                 | 0.08 ± 0.03                 |
| C <sub>9</sub> H <sub>15</sub> O <sub>7</sub> S <sup>-</sup>   | 267.0538 | 0.33 ± 0.39                 | 0.10 ± 0.08                 | 0.01 ± 0.01                 | 0.05 ± 0.03                 |
| <b>Aromatic OSs</b>                                            |          |                             |                             |                             |                             |
| C <sub>9</sub> H <sub>9</sub> O <sub>4</sub> S <sup>-</sup>    | 213.0222 | 1.88 ± 1.62                 | 0.91 ± 0.50                 | 6.22 ± 3.54                 | 18.88 ± 7.88                |
| C <sub>6</sub> H <sub>5</sub> O <sub>4</sub> S <sup>-</sup>    | 172.9909 | 0.24 ± 0.08                 | 0.27 ± 0.22                 | 1.42 ± 1.02                 | 0.72 ± 0.33                 |
| C <sub>7</sub> H <sub>7</sub> O <sub>4</sub> S <sup>-</sup>    | 187.0065 | 0.24 ± 0.18                 | 0.25 ± 0.07                 | 1.31 ± 0.55                 | 0.56 ± 0.22                 |
| C <sub>11</sub> H <sub>19</sub> O <sub>11</sub> S <sup>-</sup> | 359.0648 | 0.15 ± 0.05                 | 0.16 ± 0.05                 | 0.18 ± 0.07                 | 0.38 ± 0.12                 |
| C <sub>10</sub> H <sub>17</sub> O <sub>12</sub> S <sup>-</sup> | 361.0441 | 0.09 ± 0.01                 | 0.11 ± 0.02                 | 0.10 ± 0.01                 | 0.10 ± 0.01                 |
| C <sub>7</sub> H <sub>11</sub> O <sub>10</sub> S <sup>-</sup>  | 287.0073 | 0.14 ± 0.05                 | 0.14 ± 0.04                 | 0.10 ± 0.02                 | 0.12 ± 0.04                 |
| C <sub>8</sub> H <sub>13</sub> O <sub>9</sub> S <sup>-</sup>   | 285.0280 | 0.34 ± 0.24                 | 0.23 ± 0.12                 | 0.89 ± 0.75                 | 0.44 ± 0.18                 |
| C <sub>8</sub> H <sub>13</sub> O <sub>10</sub> S <sup>-</sup>  | 301.0229 | 0.16 ± 0.08                 | 0.15 ± 0.06                 | 0.13 ± 0.04                 | 0.17 ± 0.06                 |
| C <sub>11</sub> H <sub>17</sub> O <sub>11</sub> S <sup>-</sup> | 357.0492 | 0.16 ± 0.16                 | 0.21 ± 0.08                 | 0.20 ± 0.10                 | 0.12 ± 0.02                 |
| C <sub>9</sub> H <sub>11</sub> O <sub>13</sub> S <sup>-</sup>  | 358.9920 | 0.11 ± 0.03                 | 0.12 ± 0.02                 | 0.11 ± 0.02                 | 0.12 ± 0.05                 |
| C <sub>8</sub> H <sub>12</sub> NO <sub>11</sub> S <sup>-</sup> | 330.0131 | 0.20 ± 0.13                 | 0.12 ± 0.03                 | 0.14 ± 0.06                 | 0.20 ± 0.12                 |
| C <sub>7</sub> H <sub>7</sub> SO <sub>4</sub> S <sup>-</sup>   | 218.9786 | 0.11 ± 0.04                 | 0.14 ± 0.02                 | 0.29 ± 0.08                 | 0.19 ± 0.10                 |

|                                                               |          |             |             |             |             |
|---------------------------------------------------------------|----------|-------------|-------------|-------------|-------------|
| C <sub>8</sub> H <sub>7</sub> O <sub>5</sub> S <sup>-</sup>   | 215.0014 | 0.57 ± 0.30 | 0.33 ± 0.18 | 4.04 ± 3.58 | 1.77 ± 1.36 |
| C <sub>8</sub> H <sub>7</sub> NO <sub>5</sub> S <sup>-</sup>  | 229.0045 | 0.61 ± 0.35 | 0.68 ± 0.41 | 0.87 ± 0.52 | 1.13 ± 0.47 |
| C <sub>9</sub> H <sub>9</sub> O <sub>6</sub> S <sup>-</sup>   | 245.0120 | 0.29 ± 0.33 | 0.20 ± 0.06 | 0.70 ± 0.45 | 0.82 ± 0.41 |
| C <sub>8</sub> H <sub>7</sub> O <sub>4</sub> S <sup>-</sup>   | 199.0065 | 0.73 ± 0.47 | 0.28 ± 0.13 | 2.51 ± 2.10 | 2.13 ± 0.79 |
| C <sub>9</sub> H <sub>7</sub> O <sub>7</sub> S <sup>-</sup>   | 258.9912 | 0.54 ± 0.48 | 0.12 ± 0.03 | 0.35 ± 0.26 | 0.69 ± 1.34 |
| C <sub>8</sub> H <sub>5</sub> O <sub>6</sub> S <sup>-</sup>   | 228.9807 | 0.38 ± 0.27 | 0.14 ± 0.03 | 0.58 ± 0.50 | 0.67 ± 0.91 |
| C <sub>9</sub> H <sub>7</sub> O <sub>6</sub> S <sup>-</sup>   | 242.9963 | 0.48 ± 0.27 | 0.28 ± 0.13 | 1.61 ± 1.47 | 0.87 ± 0.73 |
| C <sub>9</sub> H <sub>3</sub> O <sub>11</sub> S <sup>-</sup>  | 318.9396 | 0.08 ± 0.01 | 0.10 ± 0.01 | 0.09 ± 0.01 | 0.08 ± 0.00 |
| C <sub>10</sub> H <sub>5</sub> O <sub>12</sub> S <sup>-</sup> | 348.9502 | 0.08 ± 0.00 | 0.10 ± 0.01 | 0.08 ± 0.00 | 0.08 ± 0.01 |
| C <sub>34</sub> H <sub>49</sub> O <sub>5</sub> S <sup>-</sup> | 569.3301 | 0.11 ± 0.04 | 0.23 ± 0.20 | 0.57 ± 0.36 | 0.38 ± 0.26 |
| C <sub>43</sub> H <sub>63</sub> O <sub>5</sub> S <sup>-</sup> | 691.4396 | 0.33 ± 0.41 | 0.52 ± 0.34 | 0.11 ± 0.03 | 0.08 ± 0.01 |
| C <sub>7</sub> H <sub>11</sub> O <sub>9</sub> S <sup>-</sup>  | 271.0124 | 0.27 ± 0.20 | 0.23 ± 0.12 | 0.17 ± 0.07 | 0.19 ± 0.08 |
| C <sub>10</sub> H <sub>7</sub> O <sub>11</sub> S <sup>-</sup> | 334.9709 | 0.08 ± 0.01 | 0.10 ± 0.01 | 0.08 ± 0.01 | 0.08 ± 0.01 |
| C <sub>10</sub> H <sub>5</sub> O <sub>11</sub> S <sup>-</sup> | 332.9553 | 0.08 ± 0.00 | 0.10 ± 0.01 | 0.09 ± 0.01 | 0.08 ± 0.00 |
| C <sub>10</sub> H <sub>5</sub> O <sub>10</sub> S <sup>-</sup> | 316.9603 | 0.07 ± 0.00 | 0.09 ± 0.01 | 0.08 ± 0.00 | 0.07 ± 0.00 |
| C <sub>12</sub> H <sub>7</sub> O <sub>13</sub> S <sup>-</sup> | 390.9607 | 0.08 ± 0.00 | 0.10 ± 0.01 | 0.08 ± 0.00 | 0.08 ± 0.00 |
| C <sub>7</sub> H <sub>5</sub> O <sub>5</sub> S <sup>-</sup>   | 200.9858 | 0.84 ± 0.55 | 0.42 ± 0.36 | 3.18 ± 3.76 | 2.12 ± 2.18 |
| C <sub>18</sub> H <sub>13</sub> O <sub>6</sub> S <sup>-</sup> | 357.0433 | 0.11 ± 0.08 | 0.15 ± 0.05 | 0.13 ± 0.03 | 0.11 ± 0.02 |
| C <sub>23</sub> H <sub>19</sub> O <sub>7</sub> S <sup>-</sup> | 439.0851 | 0.22 ± 0.14 | 0.27 ± 0.15 | 0.14 ± 0.03 | 0.22 ± 0.11 |
| C <sub>25</sub> H <sub>21</sub> O <sub>7</sub> S <sup>-</sup> | 465.1008 | 0.08 ± 0.00 | 0.11 ± 0.02 | 0.08 ± 0.00 | 0.08 ± 0.00 |
| C <sub>24</sub> H <sub>17</sub> O <sub>4</sub> S <sup>-</sup> | 401.0848 | 0.38 ± 0.13 | 0.36 ± 0.14 | 0.40 ± 0.16 | 0.90 ± 0.25 |
| C <sub>27</sub> H <sub>21</sub> O <sub>7</sub> S <sup>-</sup> | 489.1008 | 0.11 ± 0.03 | 0.13 ± 0.04 | 0.10 ± 0.03 | 0.13 ± 0.03 |

162 <sup>a</sup>Aliphatic and aromatic OSs were generally considered as anthropogenic OSs (Riva et  
163 al. 2016; Riva et al. 2015). All aliphatic and aromatic OSs and other anthropogenic  
164 OSs were collectively referred to as anthropogenic OSs (OS<sub>a</sub>).

**Table S4.** The mean mass concentrations of various OSs in PM<sub>2.5</sub> at different locations.

|               | Sampling site                | Period | Season | OS <sub>i</sub><br>(ng m <sup>-3</sup> ) | OS <sub>m</sub><br>(ng m <sup>-3</sup> ) | C <sub>2</sub> -C <sub>3</sub><br>(ng m <sup>-3</sup> ) | OS <sub>a</sub><br>(ng m <sup>-3</sup> ) | Total<br>(ng m <sup>-3</sup> ) | Ref.                           |
|---------------|------------------------------|--------|--------|------------------------------------------|------------------------------------------|---------------------------------------------------------|------------------------------------------|--------------------------------|--------------------------------|
| Urban site    | Atlanta, GA, USA             | 2014   | Summer | 1122.98                                  | 67.9                                     | 58.5                                                    | -                                        | 1249.38                        | (Hettiyadura et al. 2019a)     |
|               | Tianjing, China              | 2019   | Winter | 400.00                                   | -                                        | -                                                       | -                                        | 400.00                         | (Ding et al. 2022b)            |
|               | Lahore, Pakistan             | 2007   | Winter | 3.80                                     | -                                        | -                                                       | 2.02                                     | 5.82                           | (Kundu et al. 2013)            |
|               | Hong Kong, China             | 2017   | Winter | 97.96                                    | 17.26                                    | -                                                       | -                                        | 115.22                         | (Wang et al. 2022)             |
|               | Guangzhou, China             | 2017   | Winter | 88.03                                    | 20.96                                    | -                                                       | -                                        | 108.99                         |                                |
|               | Xian, China                  | 2014   | Winter | -                                        | 0.14                                     | 77.30                                                   | -                                        | 77.44                          | (Huang et al. 2018a)           |
|               | Shanghai, China              | 2021   | Summer | 85.38                                    | 30.61                                    | 19.31                                                   | 23.38                                    | 158.68                         | (Yang et al. 2023)             |
| Urumqi, China | 2018                         | Winter | 62.21  | 23.33                                    | 41.85                                    | 168.54                                                  | 295.93                                   | (Yang et al. 2024)             |                                |
| Suburban site | Zion, Illinois, USA          | 2013   | Spring | 121.10                                   | 8.70                                     | -                                                       | -                                        | 129.80                         | (Hughes et al. 2021)           |
| Rural site    | Look Rock, TN, USA           | 2013   | Summer | 1256.75                                  | -                                        | -                                                       | -                                        | 1256.75                        | (Budisulistiorini et al. 2015) |
|               | Centreville, AL, USA         | 2013   | Summer | 15.40                                    | -                                        | 20.83                                                   | 1.16                                     | 37.39                          | (Hettiyadura et al. 2017)      |
|               | Yorkville, GA, USA           | 2010   | Summer | 115.11                                   | -                                        | -                                                       | -                                        | 115.11                         | (Lin et al. 2013)              |
|               | Copenhagen, Denmark          | 2011   | Summer | 11.31                                    | 0.87                                     | -                                                       | -                                        | 12.18                          | (Nguyen et al. 2014)           |
|               | National Park, CO, USA       | 2016   | Summer | 19.00                                    | -                                        | -                                                       | -                                        | -                              | (Chen et al. 2021)             |
|               | Seashore, CA, USA            | 2016   | Summer | 22.00                                    | -                                        | -                                                       | -                                        | -                              |                                |
| Rural site    | Melpitz, Germany             | 2013   | Winter | 11.12                                    | 49.33                                    | -                                                       | 32.83                                    | 93.28                          | (Glasius et al. 2018)          |
|               | Vavihill, Sweden             | 2013   | Winter | 2.75                                     | 6.39                                     | -                                                       | 4.15                                     | 13.29                          |                                |
|               | Birkenes, Norway             | 2013   | Winter | 2.28                                     | 6.39                                     | -                                                       | 2.16                                     | 10.83                          |                                |
| Coastal site  | The Yellow Sea and Bohai Sea | 2019   | Summer | 22.98                                    | 7.53                                     | 12.7                                                    | -                                        | 43.21                          | (Wang et al. 2023)             |
| Urban site    | Guangzhou, China             | 2017   | Winter | 86.65                                    | 57.81                                    | 25.22                                                   | 18.54                                    | 188.22                         | In this study                  |

|  |                |  |  |        |       |       |       |        |
|--|----------------|--|--|--------|-------|-------|-------|--------|
|  | Kuming, China  |  |  | 61.12  | 58.9  | 28.55 | 18.22 | 166.79 |
|  | Taiyuan, China |  |  | 170.69 | 22.34 | 13.43 | 41.23 | 247.69 |
|  | Xi'an, China   |  |  | 260.32 | 40.09 | 25.81 | 54.21 | 380.43 |

166 **Table S5.** The relative signal intensity of identified anthropogenic OSs in different  
 167 smoke particle samples. The relative signal intensity refers to the percentage of the  
 168 target OS signal intensity in the total signal intensity of the OS group to which it  
 169 belongs.

| Formula<br>[M-H] <sup>-</sup>                                                 | Rice<br>straw | Pine<br>branch | Coal<br>combustion | Gasoline<br>vehicle | Diesel<br>vehicle |
|-------------------------------------------------------------------------------|---------------|----------------|--------------------|---------------------|-------------------|
| <b>Aliphatic OSs</b>                                                          |               |                |                    |                     |                   |
| C <sub>8</sub> H <sub>17</sub> O <sub>4</sub> S <sup>-</sup>                  | 2.91          | 0.09           | 11.23              | 1.62                | 0.86              |
| C <sub>7</sub> H <sub>15</sub> O <sub>4</sub> S <sup>-</sup>                  | 4.87          | 34.02          | 17.24              | 1.02                | 2.90              |
| C <sub>9</sub> H <sub>19</sub> O <sub>4</sub> S <sup>-</sup>                  | 2.92          | 3.27           | 2.57               | 3.81                | 1.21              |
| C <sub>10</sub> H <sub>21</sub> O <sub>4</sub> S <sup>-</sup>                 | 0.40          | 0.00           | 0.02               | 2.86                | 0.53              |
| C <sub>9</sub> H <sub>17</sub> O <sub>4</sub> S <sup>-</sup>                  | 3.80          | 0.09           | 7.35               | 7.59                | 59.32             |
| C <sub>14</sub> H <sub>29</sub> O <sub>5</sub> S <sup>-</sup>                 | 4.44          | 0.02           | 0.00               | 3.52                | 0.48              |
| C <sub>7</sub> H <sub>15</sub> O <sub>5</sub> S <sup>-</sup>                  | 0.98          | 1.02           | 2.08               | 0.30                | 0.47              |
| C <sub>7</sub> H <sub>13</sub> O <sub>5</sub> S <sup>-</sup>                  | 3.40          | 14.52          | 1.50               | 28.70               | 3.40              |
| C <sub>9</sub> H <sub>17</sub> O <sub>5</sub> S <sup>-</sup>                  | 1.76          | 3.55           | 1.27               | 0.48                | 0.59              |
| C <sub>10</sub> H <sub>19</sub> O <sub>5</sub> S <sup>-</sup>                 | 5.33          | 0.88           | 0.31               | 1.41                | 0.68              |
| C <sub>12</sub> H <sub>23</sub> O <sub>5</sub> S <sup>-</sup>                 | 0.66          | 1.22           | 0.02               | 1.34                | 1.72              |
| C <sub>13</sub> H <sub>25</sub> O <sub>5</sub> S <sup>-</sup>                 | 0.25          | 0.69           | 0.12               | 6.11                | 3.13              |
| C <sub>14</sub> H <sub>27</sub> O <sub>5</sub> S <sup>-</sup>                 | 0.29          | 2.12           | 0.00               | 0.70                | 0.64              |
| C <sub>16</sub> H <sub>31</sub> O <sub>5</sub> S <sup>-</sup>                 | 0.23          | 0.00           | 0.00               | 1.15                | 6.03              |
| C <sub>17</sub> H <sub>33</sub> O <sub>5</sub> S <sup>-</sup>                 | 16.49         | 7.62           | 0.17               | 0.68                | 0.49              |
| C <sub>18</sub> H <sub>35</sub> O <sub>5</sub> S <sup>-</sup>                 | 10.70         | 0.20           | 0.02               | 1.39                | 0.00              |
| C <sub>21</sub> H <sub>41</sub> O <sub>5</sub> S <sup>-</sup>                 | 3.44          | 0.01           | 0.02               | 0.20                | 0.00              |
| C <sub>8</sub> H <sub>15</sub> O <sub>5</sub> S <sup>-</sup>                  | 0.23          | 4.09           | 0.17               | 0.27                | 0.24              |
| C <sub>11</sub> H <sub>21</sub> O <sub>5</sub> S <sup>-</sup>                 | 0.07          | 0.48           | 0.05               | 0.62                | 0.28              |
| C <sub>15</sub> H <sub>29</sub> O <sub>5</sub> S <sup>-</sup>                 | 1.58          | 4.10           | 0.00               | 1.53                | 0.00              |
| C <sub>9</sub> H <sub>15</sub> O <sub>5</sub> S <sup>-</sup>                  | 0.68          | 2.59           | 0.82               | 1.98                | 1.69              |
| C <sub>10</sub> H <sub>17</sub> O <sub>6</sub> S <sup>-</sup>                 | 2.91          | 3.22           | 0.24               | 0.47                | 1.23              |
| C <sub>9</sub> H <sub>17</sub> O <sub>6</sub> S <sup>-</sup>                  | 1.77          | 2.84           | 0.11               | 0.98                | 0.72              |
| C <sub>13</sub> H <sub>25</sub> O <sub>6</sub> S <sup>-</sup>                 | 0.23          | 0.03           | 0.36               | 0.16                | 2.89              |
| C <sub>14</sub> H <sub>27</sub> O <sub>6</sub> S <sup>-</sup>                 | 0.17          | 0.00           | 0.24               | 1.08                | 5.60              |
| C <sub>16</sub> H <sub>31</sub> O <sub>6</sub> S <sup>-</sup>                 | 16.03         | 0.00           | 0.24               | 23.34               | 0.07              |
| C <sub>7</sub> H <sub>13</sub> O <sub>6</sub> S <sup>-</sup>                  | 0.35          | 2.65           | 0.08               | 0.41                | 0.21              |
| C <sub>8</sub> H <sub>15</sub> O <sub>6</sub> S <sup>-</sup>                  | 1.97          | 1.70           | 0.54               | 1.95                | 1.52              |
| C <sub>10</sub> H <sub>19</sub> O <sub>6</sub> S <sup>-</sup>                 | 3.47          | 0.97           | 47.71              | 0.44                | 1.00              |
| C <sub>10</sub> H <sub>17</sub> O <sub>6</sub> S <sup>-</sup>                 | 0.47          | 0.55           | 0.08               | 0.07                | 0.03              |
| C <sub>9</sub> H <sub>15</sub> O <sub>6</sub> S <sup>-</sup>                  | 0.16          | 1.20           | 0.33               | 1.08                | 0.93              |
| C <sub>11</sub> H <sub>19</sub> O <sub>6</sub> S <sup>-</sup>                 | 0.51          | 0.61           | 1.61               | 0.27                | 0.22              |
| C <sub>12</sub> H <sub>21</sub> O <sub>6</sub> S <sup>-</sup>                 | 0.10          | 0.00           | 0.00               | 0.02                | 0.03              |
| C <sub>14</sub> H <sub>25</sub> O <sub>6</sub> S <sup>-</sup>                 | 1.25          | 0.16           | 0.87               | 0.14                | 0.03              |
| C <sub>8</sub> H <sub>13</sub> O <sub>6</sub> S <sup>-</sup>                  | 0.51          | 0.89           | 1.41               | 0.87                | 0.28              |
| C <sub>12</sub> H <sub>21</sub> O <sub>7</sub> S <sup>-</sup>                 | 1.89          | 0.01           | 0.23               | 0.42                | 0.04              |
| C <sub>9</sub> H <sub>17</sub> O <sub>7</sub> S <sup>-</sup>                  | 2.18          | 0.47           | 0.69               | 0.36                | 0.33              |
| C <sub>9</sub> H <sub>15</sub> O <sub>7</sub> S <sup>-</sup>                  | 0.03          | 4.10           | 0.09               | 0.52                | 0.09              |
| C <sub>7</sub> H <sub>13</sub> O <sub>9</sub> S <sup>-</sup>                  | 0.43          | 0.03           | 0.16               | 0.04                | 0.06              |
| C <sub>26</sub> H <sub>51</sub> O <sub>12</sub> S <sup>-</sup>                | 0.18          | 0.00           | 0.00               | 0.10                | 0.00              |
| C <sub>24</sub> H <sub>51</sub> N <sub>2</sub> O <sub>13</sub> S <sup>-</sup> | 0.00          | 0.00           | 0.04               | 0.00                | 0.06              |

| <b>Aromatic OSs</b>                                                           |       |       |       |       |       |
|-------------------------------------------------------------------------------|-------|-------|-------|-------|-------|
| C <sub>24</sub> H <sub>17</sub> O <sub>4</sub> S <sup>-</sup>                 | 4.88  | 0.21  | 0.08  | 28.12 | 9.48  |
| C <sub>6</sub> H <sub>5</sub> O <sub>4</sub> S <sup>-</sup>                   | 0.50  | 0.79  | 3.16  | 0.10  | 4.92  |
| C <sub>7</sub> H <sub>7</sub> O <sub>4</sub> S <sup>-</sup>                   | 1.65  | 0.95  | 12.12 | 1.37  | 14.60 |
| C <sub>8</sub> H <sub>7</sub> O <sub>4</sub> S <sup>-</sup>                   | 0.43  | 0.65  | 1.11  | 1.16  | 49.85 |
| C <sub>9</sub> H <sub>9</sub> O <sub>4</sub> S <sup>-</sup>                   | 75.53 | 25.38 | 71.45 | 1.80  | 86.58 |
| C <sub>34</sub> H <sub>49</sub> O <sub>5</sub> S <sup>-</sup>                 | 0.22  | 0.00  | 0.00  | 0.12  | 0.00  |
| C <sub>43</sub> H <sub>63</sub> O <sub>5</sub> S <sup>-</sup>                 | 0.05  | 0.22  | 0.00  | 0.00  | 0.17  |
| C <sub>7</sub> H <sub>5</sub> O <sub>5</sub> S <sup>-</sup>                   | 0.26  | 1.00  | 0.10  | 0.77  | 0.37  |
| C <sub>8</sub> H <sub>7</sub> NO <sub>5</sub> S <sup>-</sup>                  | 1.12  | 12.38 | 2.73  | 26.95 | 6.28  |
| C <sub>8</sub> H <sub>7</sub> O <sub>5</sub> S <sup>-</sup>                   | 1.67  | 2.04  | 2.32  | 0.86  | 9.55  |
| C <sub>18</sub> H <sub>13</sub> O <sub>6</sub> S <sup>-</sup>                 | 0.02  | 1.59  | 0.33  | 0.09  | 0.23  |
| C <sub>8</sub> H <sub>5</sub> O <sub>6</sub> S <sup>-</sup>                   | 0.25  | 0.09  | 0.15  | 0.11  | 0.83  |
| C <sub>9</sub> H <sub>7</sub> O <sub>6</sub> S <sup>-</sup>                   | 0.78  | 13.07 | 0.67  | 0.35  | 2.37  |
| C <sub>9</sub> H <sub>9</sub> O <sub>6</sub> S <sup>-</sup>                   | 1.67  | 5.31  | 0.86  | 0.39  | 6.95  |
| C <sub>23</sub> H <sub>19</sub> O <sub>7</sub> S <sup>-</sup>                 | 0.01  | 7.11  | 0.26  | 0.62  | 8.85  |
| C <sub>25</sub> H <sub>21</sub> O <sub>7</sub> S <sup>-</sup>                 | 0.02  | 0.10  | 0.01  | 0.09  | 0.01  |
| C <sub>27</sub> H <sub>21</sub> O <sub>7</sub> S <sup>-</sup>                 | 1.43  | 2.59  | 2.66  | 1.80  | 3.82  |
| C <sub>9</sub> H <sub>7</sub> O <sub>7</sub> S <sup>-</sup>                   | 0.06  | 0.09  | 0.02  | 0.12  | 0.70  |
| C <sub>7</sub> H <sub>11</sub> O <sub>9</sub> S <sup>-</sup>                  | 0.07  | 0.54  | 0.05  | 0.47  | 0.24  |
| C <sub>8</sub> H <sub>13</sub> O <sub>9</sub> S <sup>-</sup>                  | 0.94  | 4.31  | 0.26  | 0.60  | 0.77  |
| C <sub>10</sub> H <sub>5</sub> O <sub>10</sub> S <sup>-</sup>                 | 0.00  | 0.00  | 0.00  | 0.00  | 0.00  |
| C <sub>7</sub> H <sub>11</sub> O <sub>10</sub> S <sup>-</sup>                 | 0.00  | 0.37  | 0.00  | 0.09  | 0.01  |
| C <sub>8</sub> H <sub>13</sub> O <sub>10</sub> S <sup>-</sup>                 | 0.04  | 0.61  | 0.06  | 0.16  | 0.38  |
| C <sub>10</sub> H <sub>5</sub> O <sub>11</sub> S <sup>-</sup>                 | 0.00  | 0.09  | 0.01  | 0.00  | 0.00  |
| C <sub>10</sub> H <sub>7</sub> O <sub>11</sub> S <sup>-</sup>                 | 0.03  | 0.12  | 0.14  | 0.01  | 0.25  |
| C <sub>11</sub> H <sub>17</sub> O <sub>11</sub> S <sup>-</sup>                | 0.18  | 1.68  | 0.38  | 0.70  | 2.71  |
| C <sub>11</sub> H <sub>19</sub> O <sub>11</sub> S <sup>-</sup>                | 3.13  | 14.58 | 0.22  | 4.46  | 0.37  |
| C <sub>12</sub> H <sub>21</sub> N <sub>2</sub> O <sub>11</sub> S <sup>-</sup> | 4.88  | 0.21  | 0.17  | 28.12 | 9.48  |
| C <sub>8</sub> H <sub>12</sub> NO <sub>11</sub> S <sup>-</sup>                | 0.10  | 2.37  | 0.59  | 0.15  | 0.00  |
| C <sub>9</sub> H <sub>13</sub> O <sub>11</sub> S <sup>-</sup>                 | 0.06  | 1.55  | 0.04  | 0.17  | 0.84  |
| C <sub>9</sub> H <sub>3</sub> O <sub>11</sub> S <sup>-</sup>                  | 0.02  | 0.01  | 0.00  | 0.19  | 0.07  |
| C <sub>10</sub> H <sub>17</sub> O <sub>12</sub> S <sup>-</sup>                | 0.00  | 0.00  | 0.07  | 0.01  | 0.07  |
| C <sub>10</sub> H <sub>5</sub> O <sub>12</sub> S <sup>-</sup>                 | 0.01  | 0.01  | 0.01  | 0.04  | 0.00  |

170

171

172 **Figure S1.**

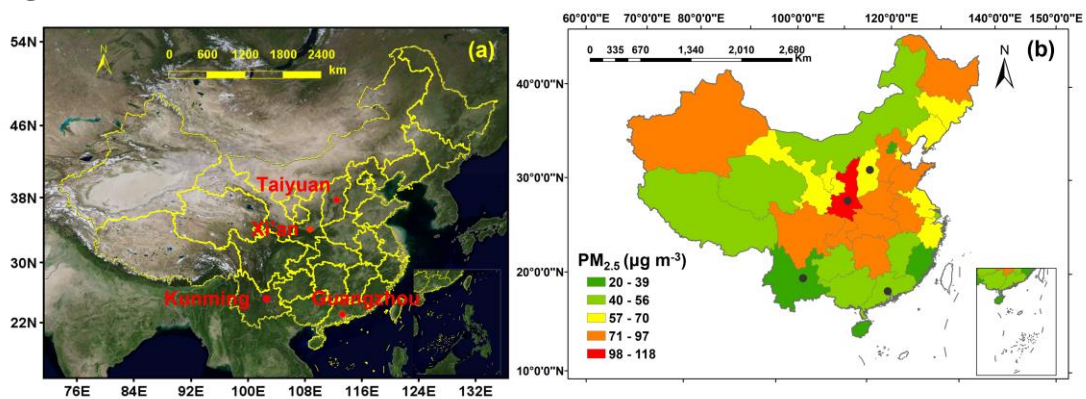

173

174 **Figure S1.** The locations of the sampling sites showing (a) the vegetation coverage in

175 China and (b) the PM<sub>2.5</sub> pollution situation during winter. The map was derived from

176 ©MeteoInfoMap (version 3.6.2) (Chinese Academy of Meteorological Sciences,

177 China).

178



179 **Figure S2.**

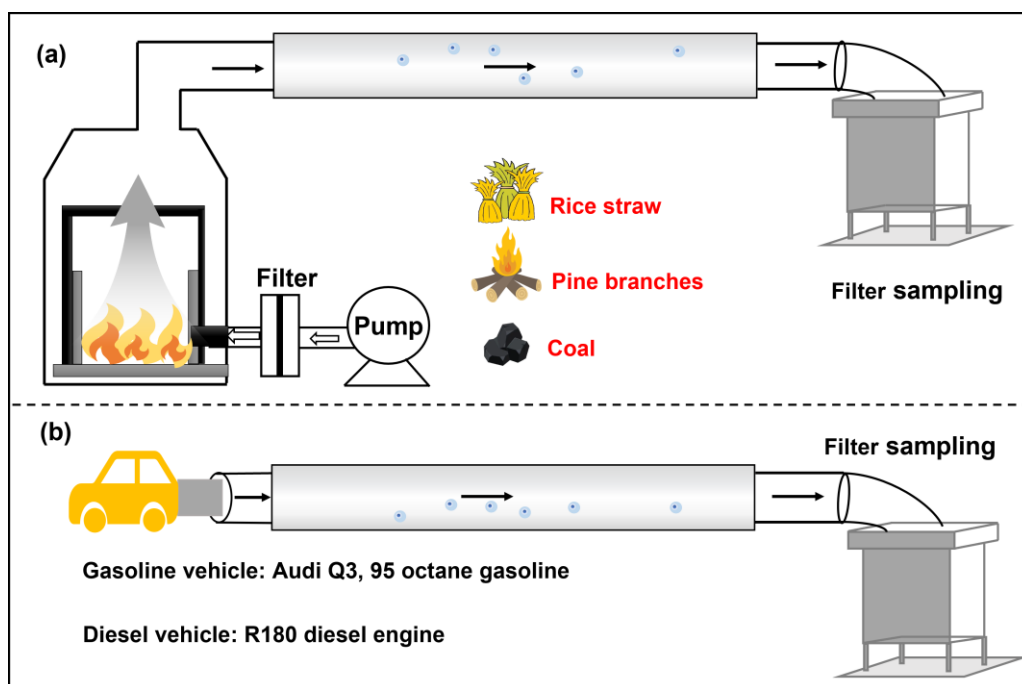

180

181 **Figure S2.** Schematic showing the collections of smoke particles derived from the  
182 combustion of (a) rice straw, pine branches, and coal as well as from (b) liquid fuel  
183 combustion (the gasoline vehicle was the Audi Q3, while the diesel vehicle features  
184 the R180 diesel engine) (Tang et al. 2020). The samples were collected through a  
185 combustion furnace pumped with filtered ambient air (particulate matter is removed).

186 **Figure S3.**

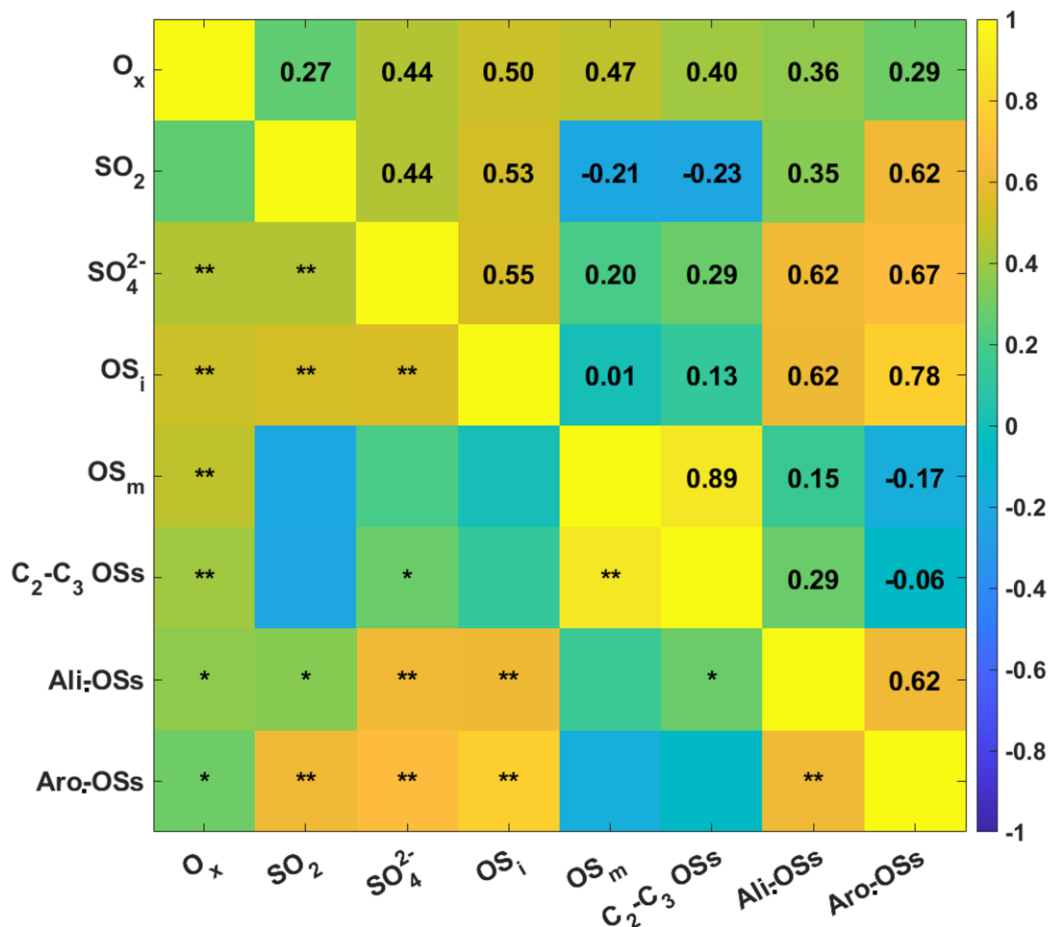

187

188 **Figure S3.** Diagrams presenting Pearson correlations among the concentrations of  
 189  $OSs$ ,  $O_x$ ,  $SO_2$ , and  $SO_4^{2-}$ . The numbers in the matrix refer to the correlation  
 190 coefficients ( $r$ ). Symbols \* and \*\* indicate  $P < 0.05$  and  $P < 0.01$ , respectively.

191

192

193 **Figure S4.**

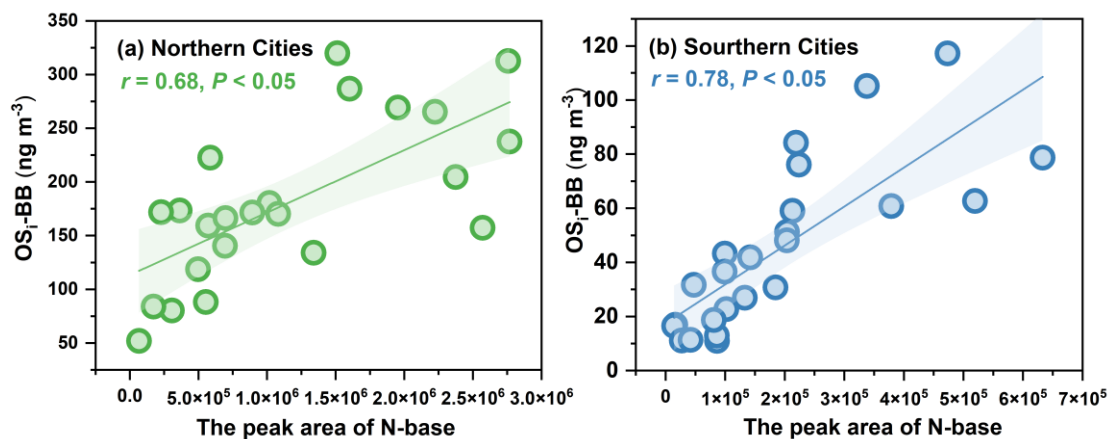

194

195 **Figure S4.** Mass concentrations of OS<sub>i</sub>-BB (including C<sub>4</sub>H<sub>7</sub>O<sub>6</sub>S<sup>-</sup>, C<sub>5</sub>H<sub>9</sub>O<sub>6</sub>S<sup>-</sup>,  
196 C<sub>5</sub>H<sub>11</sub>O<sub>6</sub>S<sup>-</sup>, C<sub>5</sub>H<sub>7</sub>O<sub>7</sub>S<sup>-</sup>, C<sub>4</sub>H<sub>7</sub>O<sub>5</sub>S<sup>-</sup>, C<sub>5</sub>H<sub>11</sub>O<sub>7</sub>S<sup>-</sup>, C<sub>5</sub>H<sub>9</sub>O<sub>7</sub>S<sup>-</sup>, and C<sub>5</sub>H<sub>9</sub>O<sub>8</sub>S<sup>-</sup>) as  
197 functions of the abundances of N-base compounds (Wang et al. 2017c) for the cases in  
198 (a) northern cities (b) southern cities.

199

200 **Figure S5.**

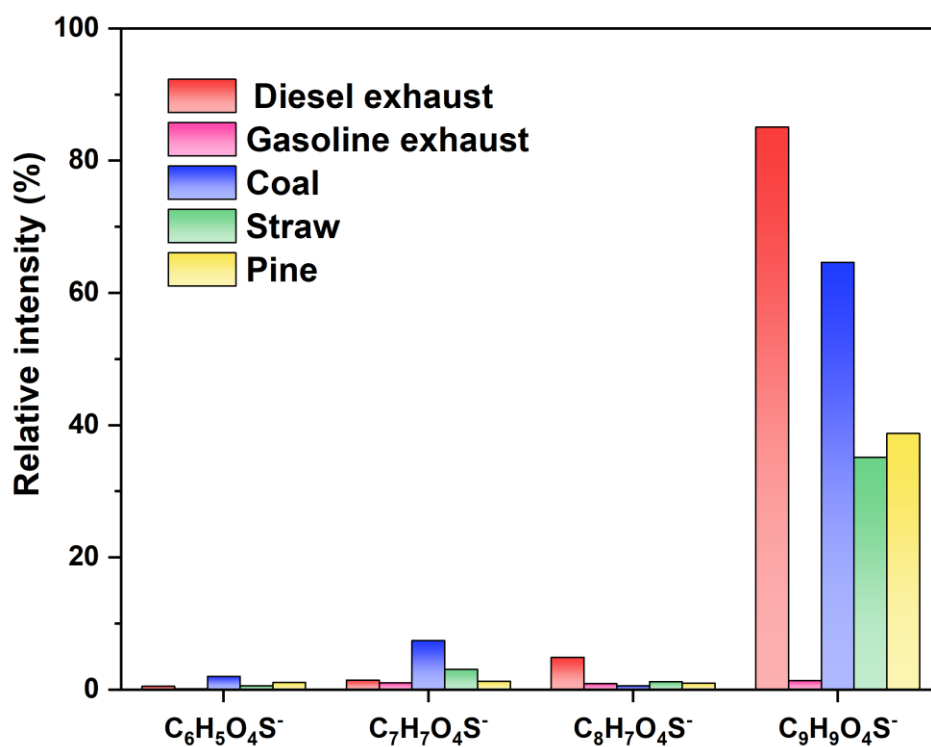

201

202 **Figure S5.** Mean relative signal intensities of typical aromatic OSs (i.e., C<sub>6</sub>H<sub>5</sub>O<sub>4</sub>S<sup>-</sup>,

203 C<sub>7</sub>H<sub>7</sub>O<sub>4</sub>S<sup>-</sup>, C<sub>8</sub>H<sub>7</sub>O<sub>4</sub>S<sup>-</sup>, and C<sub>9</sub>H<sub>9</sub>O<sub>4</sub>S<sup>-</sup>) in different smoke particle samples.

204

205

206 **Figure S6.**

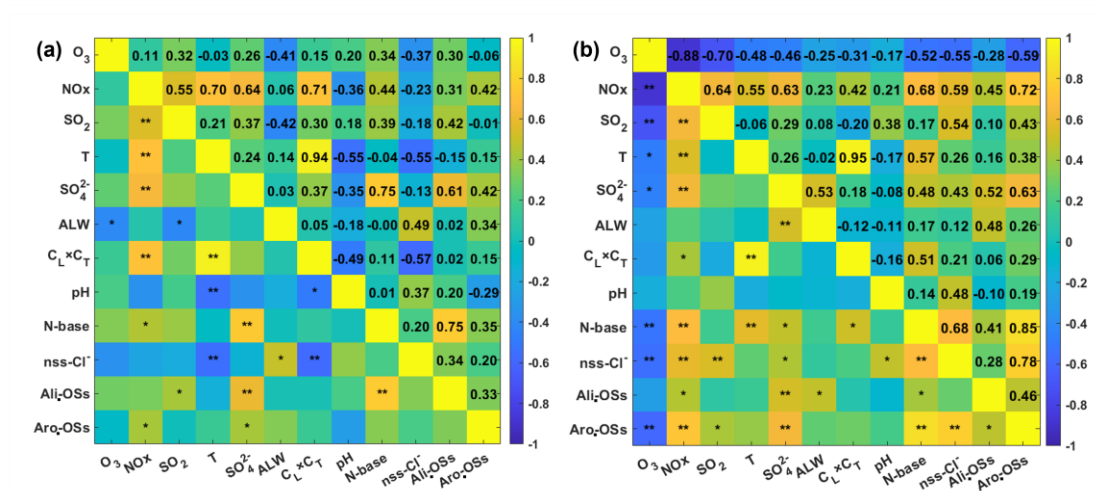

207

208 **Figure S6.** Diagrams presenting Pearson correlations among the different OS

209 subgroups and important parameters. The numbers in the matrix refer to the

210 correlation coefficients ( $r$ ). Symbols \* and \*\* indicate  $P < 0.05$  and  $P < 0.01$ ,

211 respectively.

212

213 **Figure S7.**

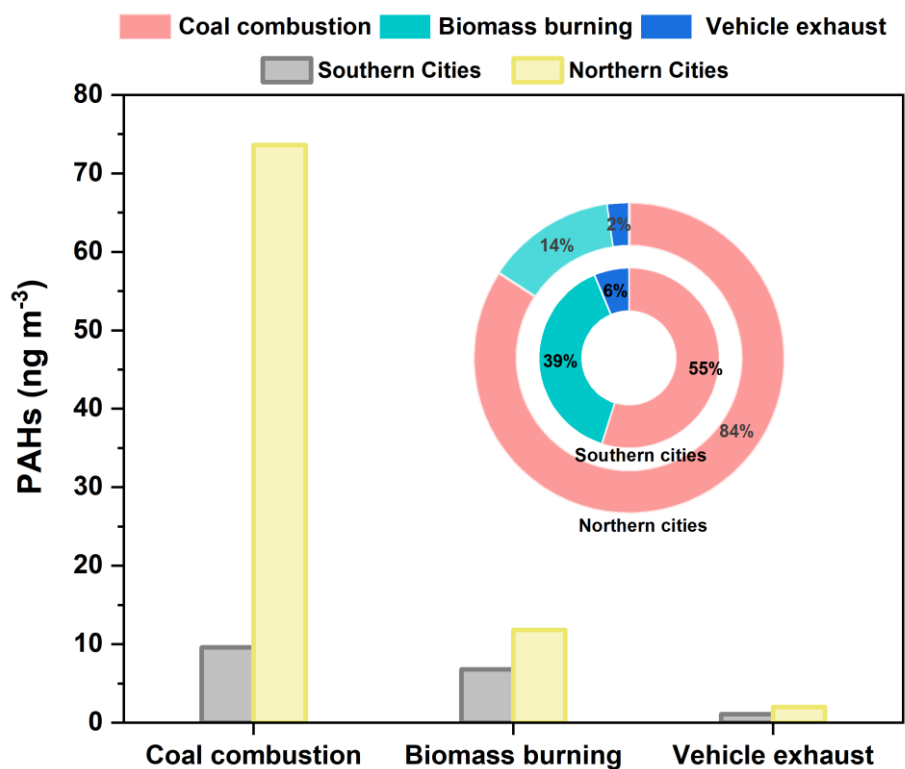

214

215 **Figure S7.** Variations in the concentration and percentage of polycyclic aromatic  
216 hydrocarbons (PAHs) emitted from coal combustion, biomass burning, and vehicle  
217 exhaust in southern and northern cities. Data were derived from previous study (Yu et  
218 al. 2020).

219

220 **Figure S8.**

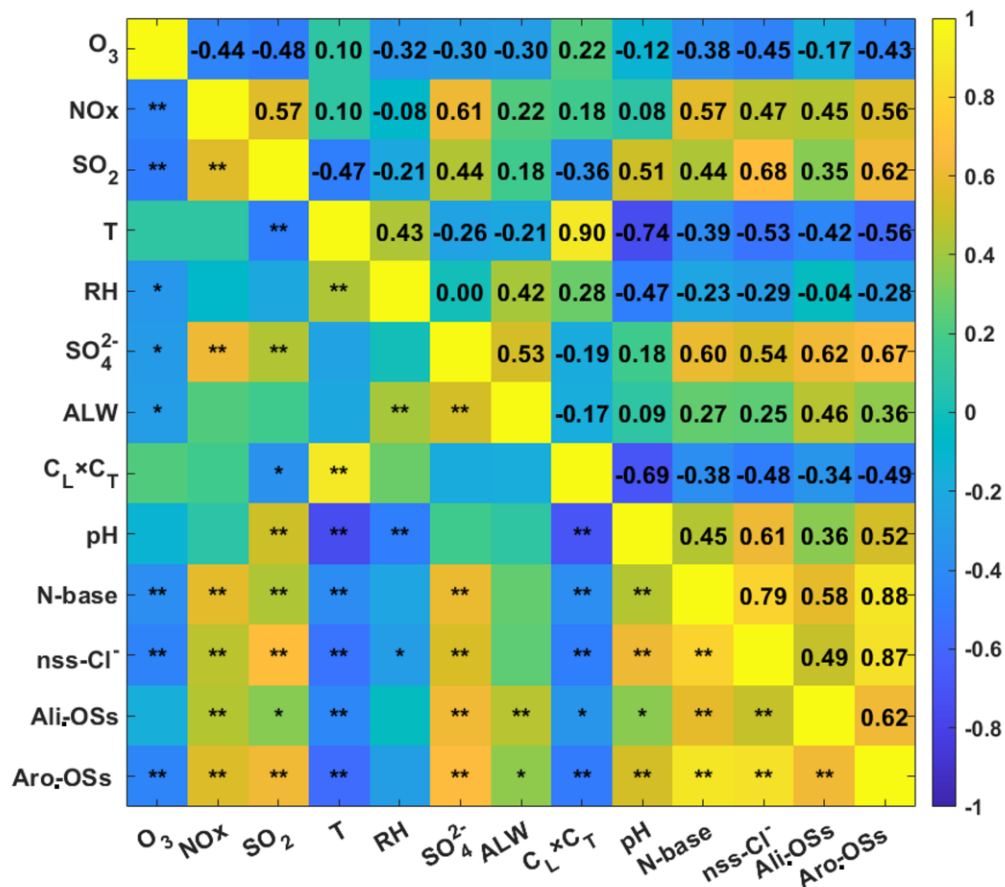

221

222 **Figure S8.** Diagrams presenting Pearson correlations among the different OS  
 223 subgroups and important parameters. The numbers in the matrix refer to the  
 224 correlation coefficients ( $r$ ). Symbols \* and \*\* indicate  $P < 0.05$  and  $P < 0.01$ ,  
 225 respectively.

226

227 **References**

- 228 Berndt, T., Mentler, B., Scholz, W., Fischer, L., Herrmann, H., Kulmala, M., and  
229 Hansel, A.: Accretion Product Formation from Ozonolysis and OH Radical  
230 Reaction of alpha-Pinene: Mechanistic Insight and the Influence of Isoprene  
231 and Ethylene, *Environ. Sci. Technol.*, **52**, 11069-11077,  
232 10.1021/acs.est.8b02210, 2018.
- 233 Berndt, T., Richters, S., Jokinen, T., Hyttinen, N., Kurten, T., Otkjaer, R. V.,  
234 Kjaergaard, H. G., Stratmann, F., Herrmann, H., Sipila, M., Kulmala, M., and  
235 Ehn, M.: Hydroxyl radical-induced formation of highly oxidized organic  
236 compounds, *Nat. Commun.*, **7**, 13677, 10.1038/ncomms13677, 2016.
- 237 Boyd, C. M., Sanchez, J., Xu, L., Eugene, A. J., Nah, T., Tuet, W. Y., Guzman, M. I.,  
238 and Ng, N. L.: Secondary organic aerosol formation from the  $\beta$ -pinene+NO<sub>3</sub>  
239 system: effect of humidity and peroxy radical fate, *Atmos. Chem. Phys.*, **15**,  
240 7497-7522, 10.5194/acp-15-7497-2015, 2015.
- 241 Bryant, D. J., Elzein, A., Newland, M., White, E., Swift, S., Watkins, A., Deng, W.,  
242 Song, W., Wang, S., Zhang, Y., Wang, X., Rickard, A. R., and Hamilton, J. F.:  
243 Importance of Oxidants and Temperature in the Formation of Biogenic  
244 Organosulfates and Nitrooxy Organosulfates, *ACS Earth and Space Chemistry*,  
245 **5**, 2291-2306, 10.1021/acsearthspacechem.1c00204, 2021.
- 246 Budisulistiorini, S. H., Li, X., Bairai, S. T., Renfro, J., Liu, Y., Liu, Y. J., McKinney, K.  
247 A., Martin, S. T., McNeill, V. F., Pye, H. O. T., Nenes, A., Neff, M. E., Stone,  
248 E. A., Mueller, S., Knote, C., Shaw, S. L., Zhang, Z., Gold, A., and Surratt, J.



249 D.: Examining the effects of anthropogenic emissions on isoprene-derived  
250 secondary organic aerosol formation during the 2013 Southern Oxidant and  
251 Aerosol Study (SOAS) at the Look Rock, Tennessee ground site, *Atmos.*  
252 *Chem. Phys.*, 15, 8871-8888, 10.5194/acp-15-8871-2015, 2015.

253 Cai, D., Wang, X., Chen, J., and Li, X.: Molecular Characterization of Organosulfates  
254 in Highly Polluted Atmosphere Using Ultra-High-Resolution Mass  
255 Spectrometry, *J. Geophys. Res. Atmos.*, 125, 10.1029/2019jd032253, 2020.

256 Chen, Y., Dombek, T., Hand, J., Zhang, Z., Gold, A., Ault, A. P., Levine, K. E., and  
257 Surratt, J. D.: Seasonal Contribution of Isoprene-Derived Organosulfates to  
258 Total Water-Soluble Fine Particulate Organic Sulfur in the United States, *ACS*  
259 *Earth and Space Chemistry*, 5, 2419-2432,  
260 10.1021/acsearthspacechem.1c00102, 2021.

261 Ding, S., Chen, Y., Devineni, S. R., Pavuluri, C. M., and Li, X.-D.: Distribution  
262 characteristics of organosulfates (OSs) in PM<sub>2.5</sub> in Tianjin, Northern China:  
263 Quantitative analysis of total and three OS species, *Sci. Total Environ.*, 834,  
264 10.1016/j.scitotenv.2022.155314, 2022a.

265 Ding, S., Chen, Y., Devineni, S. R., Pavuluri, C. M., and Li, X. D.: Distribution  
266 characteristics of organosulfates (OSs) in PM<sub>2.5</sub> in Tianjin, Northern China:  
267 Quantitative analysis of total and three OS species, *Sci. Total. Environ.*, 834,  
268 155314, 10.1016/j.scitotenv.2022.155314, 2022b.

269 Ding, X., He, Q.-F., Shen, R.-Q., Yu, Q.-Q., Zhang, Y.-Q., Xin, J.-Y., Wen, T.-X., and  
270 Wang, X.-M.: Spatial and seasonal variations of isoprene secondary organic

271 aerosol in China: Significant impact of biomass burning during winter,  
272 Scientific Reports, 6, 10.1038/srep20411, 2016.

273 Ehn, M., Kleist, E., Junninen, H., Petäjä, T., Lönn, G., Schobesberger, S., Dal Maso,  
274 M., Trimborn, A., Kulmala, M., Worsnop, D. R., Wahner, A., Wildt, J., and  
275 Mentel, T. F.: Gas phase formation of extremely oxidized pinene reaction  
276 products in chamber and ambient air, Atmos. Chem. Phys., 12, 5113-5127,  
277 10.5194/acp-12-5113-2012, 2012.

278 Ehn, M., Thornton, J. A., Kleist, E., Sipila, M., Junninen, H., Pullinen, I., Springer, M.,  
279 Rubach, F., Tillmann, R., Lee, B., Lopez-Hilfiker, F., Andres, S., Acir, I. H.,  
280 Rissanen, M., Jokinen, T., Schobesberger, S., Kangasluoma, J., Kontkanen, J.,  
281 Nieminen, T., Kurten, T., Nielsen, L. B., Jorgensen, S., Kjaergaard, H. G.,  
282 Canagaratna, M., Maso, M. D., Berndt, T., Petaja, T., Wahner, A., Kerminen, V.  
283 M., Kulmala, M., Worsnop, D. R., Wildt, J., and Mentel, T. F.: A large source  
284 of low-volatility secondary organic aerosol, Nature, 506, 476-479,  
285 10.1038/nature13032, 2014.

286 Glasius, M., Hansen, A. M. K., Claeys, M., Henzing, J. S., Jedynska, A. D., Kasper-  
287 Giebl, A., Kistler, M., Kristensen, K., Martinsson, J., Maenhaut, W., Nøjgaard,  
288 J. K., Spindler, G., Stenström, K. E., Swietlicki, E., Szidat, S., Simpson, D.,  
289 and Yttri, K. E.: Composition and sources of carbonaceous aerosols in  
290 Northern Europe during winter, Atmos. Environ., 173, 127-141,  
291 10.1016/j.atmosenv.2017.11.005, 2018.

292 Guenther , A. B., Zimmerman, P. R., Harley, P. C., Monson, R. K., and Fall, R.:

293 Isoprene and monoterpene emission rate variability *J. Geophys. Res. Atmos.*,  
294 98, 12609-12617, 1993.

295 Guo, Y., Yan, C., Liu, Y., Qiao, X., Zheng, F., Zhang, Y., Zhou, Y., Li, C., Fan, X., Lin,  
296 Z., Feng, Z., Zhang, Y., Zheng, P., Tian, L., Nie, W., Wang, Z., Huang, D.,  
297 Daellenbach, K. R., Yao, L., Dada, L., Bianchi, F., Jiang, J., Liu, Y., Kerminen,  
298 V.-M., and Kulmala, M.: Seasonal variation in oxygenated organic molecules  
299 in urban Beijing and their contribution to secondary organic aerosol, *Atmos.*  
300 *Chem. Phys.*, 22, 10077-10097, 10.5194/acp-22-10077-2022, 2022.

301 Han, Y., Zhang, X., Li, L., Lin, Y., Zhu, C., Zhang, N., Wang, Q., and Cao, J.:  
302 Enhanced Production of Organosulfur Species during a Severe Winter Haze  
303 Episode in the Guanzhong Basin of Northwest China, *Environ. Sci. Technol.*,  
304 57, 8708-8718, 10.1021/acs.est.3c02914, 2023.

305 Hettiyadura, A. P. S., Al-Naiema, I. M., Hughes, D. D., Fang, T., and Stone, E. A.:  
306 Organosulfates in Atlanta, Georgia: anthropogenic influences on biogenic  
307 secondary organic aerosol formation, *Atmos. Chem. Phys.*, 19, 3191-3206,  
308 10.5194/acp-19-3191-2019, 2019a.

309 Hettiyadura, A. P. S., Al-Naiema, I. M., Hughes, D. D., Fang, T., and Stone, E. A.:  
310 Organosulfates in Atlanta, Georgia: anthropogenic influences on biogenic  
311 secondary organic aerosol formation, *Atmos. Chem. Phys.*, 19, 3191-3206,  
312 10.5194/acp-19-3191-2019, 2019b.

313 Hettiyadura, A. P. S., Stone, E. A., Kundu, S., Baker, Z., Geddes, E., Richards, K., and  
314 Humphry, T.: Determination of atmospheric organosulfates using HILIC

315 chromatography with MS detection, *Atmos. Meas. Tech.*, 8, 2347-2358,  
316 10.5194/amt-8-2347-2015, 2015.

317 Hettiyadura, A. P. S., Jayarathne, T., Baumann, K., Goldstein, A. H., de Gouw, J. A.,  
318 Koss, A., Keutsch, F. N., Skog, K., and Stone, E. A.: Qualitative and  
319 quantitative analysis of atmospheric organosulfates in Centreville, Alabama,  
320 *Atmos. Chem. Phys.*, 17, 1343-1359, 10.5194/acp-17-1343-2017, 2017.

321 Huang, L., Wang, Y., Zhao, Y., Hu, H., Yang, Y., Wang, Y., Yu, J. Z., Chen, T., Cheng,  
322 Z., Li, C., Li, Z., and Xiao, H.: Biogenic and Anthropogenic Contributions to  
323 Atmospheric Organosulfates in a Typical Megacity in Eastern China, *J.*  
324 *Geophys. Res. Atmos.*, 128, 10.1029/2023jd038848, 2023.

325 Huang, R.-J., Cao, J., Chen, Y., Yang, L., Shen, J., You, Q., Wang, K., Lin, C., Xu, W.,  
326 Gao, B., Li, Y., Chen, Q., Hoffmann, T., O'Dowd, C. D., Bilde, M., and  
327 Glasius, M.: Organosulfates in atmospheric aerosol: synthesis and quantitative  
328 analysis of PM<sub>2.5</sub> from Xi'an, northwestern China, *Atmos. Meas. Tech.*, 11,  
329 3447-3456, 10.5194/amt-11-3447-2018, 2018a.

330 Huang, R.-J., Cao, J., Chen, Y., Yang, L., Shen, J., You, Q., Wang, K., Lin, C., Xu, W.,  
331 Gao, B., Li, Y., Chen, Q., Hoffmann, T., O'Dowd, C. D., Bilde, M., and  
332 Glasius, M.: Organosulfates in atmospheric aerosol: synthesis and quantitative  
333 analysis of PM<sub>2.5</sub> from Xi'an, northwestern China, *Atmos. Meas. Tech.*, 11,  
334 3447-3456, 10.5194/amt-11-3447-2018, 2018b.

335 Hughes, D. D., Christiansen, M. B., Milani, A., Vermeuel, M. P., Novak, G. A., Alwe,  
336 H. D., Dickens, A. F., Pierce, R. B., Millet, D. B., Bertram, T. H., Stanier, C.

337 O., and Stone, E. A.: PM<sub>2.5</sub> chemistry, organosulfates, and secondary organic  
338 aerosol during the 2017 Lake Michigan Ozone Study, *Atmos. Environ.*, 244,  
339 10.1016/j.atmosenv.2020.117939, 2021.

340 Jiang, H., Li, J., Tang, J., Cui, M., Zhao, S., Mo, Y., Tian, C., Zhang, X., Jiang, B.,  
341 Liao, Y., Chen, Y., and Zhang, G.: Molecular characteristics, sources, and  
342 formation pathways of organosulfur compounds in ambient aerosol in  
343 Guangzhou, South China, *Atmos. Chem. Phys.*, 22, 6919-6935, 10.5194/acp-  
344 22-6919-2022, 2022.

345 Jokinen, T., Sipila, M., Richters, S., Kerminen, V. M., Paasonen, P., Stratmann, F.,  
346 Worsnop, D., Kulmala, M., Ehn, M., Herrmann, H., and Berndt, T.: Rapid  
347 autoxidation forms highly oxidized RO<sub>2</sub> radicals in the atmosphere, *Angew.  
348 Chem. Int. Ed. Engl.*, 53, 14596-14600, 10.1002/anie.201408566, 2014.

349 Kundu, S., Quraishi, T. A., Yu, G., Suarez, C., Keutsch, F. N., and Stone, E. A.:  
350 Evidence and quantitation of aromatic organosulfates in ambient aerosols in  
351 Lahore, Pakistan, *Atmos. Chem. Phys.*, 13, 4865-4875, 10.5194/acp-13-4865-  
352 2013, 2013.

353 Lin, Y. H., Knipping, E. M., Edgerton, E. S., Shaw, S. L., and Surratt, J. D.:  
354 Investigating the influences of SO<sub>2</sub> and NH<sub>3</sub> levels on isoprene-derived  
355 secondary organic aerosol formation using conditional sampling approaches,  
356 *Atmos. Chem. Phys.*, 13, 8457-8470, 10.5194/acp-13-8457-2013, 2013.

357 Ma, J., Ungeheuer, F., Zheng, F., Du, W., Wang, Y., Cai, J., Zhou, Y., Yan, C., Liu, Y.,  
358 Kulmala, M., Daellenbach, K. R., and Vogel, A. L.: Nontarget Screening

359 Exhibits a Seasonal Cycle of PM<sub>2.5</sub> Organic Aerosol Composition in Beijing,  
360 Environ. Sci. Technol., 56, 7017-7028, 10.1021/acs.est.1c06905, 2022.

361 Nguyen, Q. T., Christensen, M. K., Cozzi, F., Zare, A., Hansen, A. M. K., Kristensen,  
362 K., Tulinius, T. E., Madsen, H. H., Christensen, J. H., Brandt, J., Massling, A.,  
363 Nøjgaard, J. K., and Glasius, M.: Understanding the anthropogenic influence  
364 on formation of biogenic secondary organic aerosols in Denmark via analysis  
365 of organosulfates and related oxidation products, Atmos. Chem. Phys., 14,  
366 8961-8981, 10.5194/acp-14-8961-2014, 2014.

367 Nozière, B., Ekström, S., Alsberg, T., and Holmström, S.: Radical-initiated formation  
368 of organosulfates and surfactants in atmospheric aerosols, Geophys. Res. Lett.,  
369 37, n/a-n/a, 10.1029/2009gl041683, 2010a.

370 Nozière, B., Ekström, S., Alsberg, T., and Holmström, S.: Radical-initiated formation  
371 of organosulfates and surfactants in atmospheric aerosols, Geophys. Res. Lett.,  
372 37, n/a-n/a, 10.1029/2009gl041683, 2010b.

373 Olson, C. N., Galloway, M. M., Yu, G., Hedman, C. J., Lockett, M. R., Yoon, T.,  
374 Stone, E. A., Smith, L. M., and Keutsch, F. N.: Hydroxycarboxylic Acid-  
375 Derived Organosulfates: Synthesis, Stability, and Quantification in Ambient  
376 Aerosol, Environ. Sci. Technol., 45, 6468-6474, 10.1021/es201039p, 2011.

377 Riva, M., Budisulistiorini, S. H., Zhang, Z., Gold, A., and Surratt, J. D.: Chemical  
378 characterization of secondary organic aerosol constituents from isoprene  
379 ozonolysis in the presence of acidic aerosol, Atmos. Environ., 130, 5-13,  
380 10.1016/j.atmosenv.2015.06.027, 2016.

381 Riva, M., Tomaz, S., Cui, T., Lin, Y. H., Perraudin, E., Gold, A., Stone, E. A.,  
382 Villenave, E., and Surratt, J. D.: Evidence for an unrecognized secondary  
383 anthropogenic source of organosulfates and sulfonates: gas-phase oxidation of  
384 polycyclic aromatic hydrocarbons in the presence of sulfate aerosol, *Environ.*  
385 *Sci. Technol.*, 49, 6654-6664, 10.1021/acs.est.5b00836, 2015.

386 Surratt, J. D., Gómez-González, Y., Chan, A. W. H., Vermeylen, R., Shahgholi, M.,  
387 Kleindienst, T. E., Edney, E. O., Offenberg, J. H., Lewandowski, M., Jaoui, M.,  
388 Maenhaut, W., Claeys, M., Flagan, R. C., and Seinfeld, J. H.: Organosulfate  
389 Formation in Biogenic Secondary Organic Aerosol, *J. Phys. Chem. A.*, 112,  
390 8345-8378, 10.1021/jp802310p, 2008.

391 Tang, J., Li, J., Su, T., Han, Y., Mo, Y., Jiang, H., Cui, M., Jiang, B., Chen, Y., Tang, J.,  
392 Song, J., Peng, P. a., and Zhang, G.: Molecular compositions and optical  
393 properties of dissolved brown carbon in biomass burning, coal combustion,  
394 and vehicle emission aerosols illuminated by excitation–emission matrix  
395 spectroscopy and Fourier transform ion cyclotron resonance mass  
396 spectrometry analysis, *Atmos. Chem. Phys.*, 20, 2513-2532, 10.5194/acp-20-  
397 2513-2020, 2020.

398 Tao, S., Lu, X., Levac, N., Bateman, A. P., Nguyen, T. B., Bones, D. L., Nizkorodov,  
399 S. A., Laskin, J., Laskin, A., and Yang, X.: Molecular characterization of  
400 organosulfates in organic aerosols from Shanghai and Los Angeles urban areas  
401 by nanospray-desorption electrospray ionization high-resolution mass  
402 spectrometry, *Environ. Sci. Technol.*, 48, 10993-11001, 10.1021/es5024674,

403 2014.

404 Trostl, J., Chuang, W. K., Gordon, H., Heinritzi, M., Yan, C., Molteni, U., Ahlm, L.,  
405 Frege, C., Bianchi, F., Wagner, R., Simon, M., Lehtipalo, K., Williamson, C.,  
406 Craven, J. S., Duplissy, J., Adamov, A., Almeida, J., Bernhammer, A. K.,  
407 Breitenlechner, M., Brilke, S., Dias, A., Ehrhart, S., Flagan, R. C., Franchin,  
408 A., Fuchs, C., Guida, R., Gysel, M., Hansel, A., Hoyle, C. R., Jokinen, T.,  
409 Junninen, H., Kangasluoma, J., Keskinen, H., Kim, J., Krapf, M., Kurten, A.,  
410 Laaksonen, A., Lawler, M., Leiminger, M., Mathot, S., Mohler, O., Nieminen,  
411 T., Onnela, A., Petaja, T., Piel, F. M., Miettinen, P., Rissanen, M. P., Rondo, L.,  
412 Sarnela, N., Schobesberger, S., Sengupta, K., Sipila, M., Smith, J. N., Steiner,  
413 G., Tome, A., Virtanen, A., Wagner, A. C., Weingartner, E., Wimmer, D.,  
414 Winkler, P. M., Ye, P., Carslaw, K. S., Curtius, J., Dommen, J., Kirkby, J.,  
415 Kulmala, M., Riipinen, I., Worsnop, D. R., Donahue, N. M., and Baltensperger,  
416 U.: The role of low-volatility organic compounds in initial particle growth in  
417 the atmosphere, *Nature*, 533, 527-531, 10.1038/nature18271, 2016.

418 Wang, Y., Ren, J., Huang, X. H. H., Tong, R., and Yu, J. Z.: Synthesis of Four  
419 Monoterpene-Derived Organosulfates and Their Quantification in  
420 Atmospheric Aerosol Samples, *Environ. Sci. Technol.*, 51, 6791-6801,  
421 10.1021/acs.est.7b01179, 2017a.

422 Wang, Y., Ren, J., Huang, X. H. H., Tong, R., and Yu, J. Z.: Synthesis of Four  
423 Monoterpene-Derived Organosulfates and Their Quantification in  
424 Atmospheric Aerosol Samples, *Environ. Sci. Technol.*, 51, 6791-6801,



425 10.1021/acs.est.7b01179, 2017b.

426 Wang, Y., Ma, Y., Kuang, B., Lin, P., Liang, Y., Huang, C., and Yu, J. Z.: Abundance  
427 of organosulfates derived from biogenic volatile organic compounds: Seasonal  
428 and spatial contrasts at four sites in China, *Sci. Total Environ.*, 806,  
429 10.1016/j.scitotenv.2021.151275, 2022.

430 Wang, Y., Zhao, Y., Wang, Y., Yu, J.-Z., Shao, J., Liu, P., Zhu, W., Cheng, Z., Li, Z.,  
431 Yan, N., and Xiao, H.: Organosulfates in atmospheric aerosols in Shanghai,  
432 China: seasonal and interannual variability, origin, and formation mechanisms,  
433 *Atmos. Chem. Phys.*, 21, 2959-2980, 10.5194/acp-21-2959-2021, 2021a.

434 Wang, Y., Hu, M., Wang, Y.-C., Li, X., Fang, X., Tang, R., Lu, S., Wu, Y., Guo, S., Wu,  
435 Z., Hallquist, M., and Yu, J. Z.: Comparative Study of Particulate  
436 Organosulfates in Contrasting Atmospheric Environments: Field Evidence for  
437 the Significant Influence of Anthropogenic Sulfate and NO<sub>x</sub>, *Environmental  
438 Science & Technology Letters*, 7, 787-794, 10.1021/acs.estlett.0c00550, 2020.

439 Wang, Y., Hu, M., Lin, P., Guo, Q., Wu, Z., Li, M., Zeng, L., Song, Y., Zeng, L., Wu,  
440 Y., Guo, S., Huang, X., and He, L.: Molecular Characterization of Nitrogen-  
441 Containing Organic Compounds in Humic-like Substances Emitted from  
442 Straw Residue Burning, *Environ. Sci. Technol.*, 51, 5951-5961,  
443 10.1021/acs.est.7b00248, 2017c.

444 Wang, Y., Zhang, Y., Li, W., Wu, G., Qi, Y., Li, S., Zhu, W., Yu, J. Z., Yu, X., Zhang,  
445 H.-H., Sun, J., Wang, W., Sheng, L., Yao, X., Gao, H., Huang, C., Ma, Y., and  
446 Zhou, Y.: Important Roles and Formation of Atmospheric Organosulfates in

447 Marine Organic Aerosols: Influence of Phytoplankton Emissions and  
448 Anthropogenic Pollutants, *Environ. Sci. Technol.*, 57, 10284-10294,  
449 10.1021/acs.est.3c01422, 2023.

450 Wang, Y., Hu, M., Guo, S., Wang, Y., Zheng, J., Yang, Y., Zhu, W., Tang, R., Li, X.,  
451 Liu, Y., Le Breton, M., Du, Z., Shang, D., Wu, Y., Wu, Z., Song, Y., Lou, S.,  
452 Hallquist, M., and Yu, J.: The secondary formation of organosulfates under  
453 interactions between biogenic emissions and anthropogenic pollutants in  
454 summer in Beijing, *Atmos. Chem. Phys.*, 18, 10693-10713, 10.5194/acp-18-  
455 10693-2018, 2018.

456 Wang, Z., Ehn, M., Rissanen, M. P., Garmash, O., Quéléver, L., Xing, L., Monge-  
457 Palacios, M., Rantala, P., Donahue, N. M., Berndt, T., and Sarathy, S. M.:  
458 Efficient alkane oxidation under combustion engine and atmospheric  
459 conditions, *Commun. Chem.*, 4, 10.1038/s42004-020-00445-3, 2021b.

460 Xie, Q., Su, S., Chen, J., Dai, Y., Yue, S., Su, H., Tong, H., Zhao, W., Ren, L., Xu, Y.,  
461 Cao, D., Li, Y., Sun, Y., Wang, Z., Liu, C.-Q., Kawamura, K., Jiang, G., Cheng,  
462 Y., and Fu, P.: Increase of nitrooxy organosulfates in firework-related urban  
463 aerosols during Chinese New Year's Eve, *Atmos. Chem. Phys.*, 21, 11453-  
464 11465, 10.5194/acp-21-11453-2021, 2021.

465 Xie, Q., Li, Y., Yue, S., Su, S., Cao, D., Xu, Y., Chen, J., Tong, H., Su, H., Cheng, Y.,  
466 Zhao, W., Hu, W., Wang, Z., Yang, T., Pan, X., Sun, Y., Wang, Z., Liu, C. Q.,  
467 Kawamura, K., Jiang, G., Shiraiwa, M., and Fu, P.: Increase of High  
468 Molecular Weight Organosulfate With Intensifying Urban Air Pollution in the

469 Megacity Beijing, *J. Geophys. Res.: Atmos.* , 125, 10.1029/2019jd032200,  
470 2020.

471 Yan, C., Nie, W., Äijälä, M., Rissanen, M. P., Canagaratna, M. R., Massoli, P.,  
472 Junninen, H., Jokinen, T., Sarnela, N., Häme, S. A. K., Schobesberger, S.,  
473 Canonaco, F., Yao, L., Prévôt, A. S. H., Petäjä, T., Kulmala, M., Sipilä, M.,  
474 Worsnop, D. R., and Ehn, M.: Source characterization of highly oxidized  
475 multifunctional compounds in a boreal forest environment using positive  
476 matrix factorization, *Atmos. Chem. Phys.*, 16, 12715-12731, 10.5194/acp-16-  
477 12715-2016, 2016.

478 Yang, T., Xu, Y., Ma, Y.-J., Wang, Y.-C., Yu, J. Z., Sun, Q.-B., Xiao, H.-W., Xiao, H.-  
479 Y., and Liu, C.-Q.: Field Evidence for Constraints of Nearly Dry and Weakly  
480 Acidic Aerosol Conditions on the Formation of Organosulfates,  
481 *Environmental Science & Technology Letters*, 10.1021/acs.estlett.4c00522,  
482 2024.

483 Yang, T., Xu, Y., Ye, Q., Ma, Y.-J., Wang, Y.-C., Yu, J.-Z., Duan, Y.-S., Li, C.-X., Xiao,  
484 H.-W., Li, Z.-Y., Zhao, Y., and Xiao, H.-Y.: Spatial and diurnal variations of  
485 aerosol organosulfates in summertime Shanghai, China: potential influence of  
486 photochemical processes and anthropogenic sulfate pollution, *Atmos. Chem.*  
487 *Phys.*, 23, 13433-13450, 10.5194/acp-23-13433-2023, 2023.

488 Yassine, M. M., Dabek-Zlotorzynska, E., Harir, M., and Schmitt-Kopplin, P.:  
489 Identification of weak and strong organic acids in atmospheric aerosols by  
490 capillary electrophoresis/mass spectrometry and ultra-high-resolution Fourier

491 transform ion cyclotron resonance mass spectrometry, *Anal. Chem.*, 84, 6586-  
492 6594, 10.1021/ac300798g, 2012.

493 Yassine, M. M., Harir, M., Dabek-Zlotorzynska, E., and Schmitt-Kopplin, P.:  
494 Structural characterization of organic aerosol using Fourier transform ion  
495 cyclotron resonance mass spectrometry: aromaticity equivalent approach,  
496 *Rapid. Commun. Mass. Spectrom.*, 28, 2445-2454, 10.1002/rcm.7038, 2014.

497 Ye, Y., Zhan, H., Yu, X., Li, J., Wang, X., and Xie, Z.: Detection of organosulfates and  
498 nitrooxy-organosulfates in Arctic and Antarctic atmospheric aerosols, using  
499 ultra-high resolution FT-ICR mass spectrometry, *Sci. Total Environ.*, 767,  
500 10.1016/j.scitotenv.2020.144339, 2021.

501 Yu, Q., Ding, X., He, Q., Yang, W., Zhu, M., Li, S., Zhang, R., Shen, R., Zhang, Y., Bi,  
502 X., Wang, Y., Peng, P. a., and Wang, X.: Nationwide increase of polycyclic  
503 aromatic hydrocarbons in ultrafine particles during winter over China revealed  
504 by size-segregated measurements, *Atmos. Chem. Phys.*, 20, 14581-14595,  
505 10.5194/acp-20-14581-2020, 2020.

506
